# Supplementary material
Source: publisher figshare collection journal article supplement (https://sage.figshare.com/ndownloader/files/20161856)
Supplement: Supplementary file 1 [file 20161856]

## Sheet: Main page 
eTable 1. Detailed data on studies included in the analysis.
																					ALL STUDIES	ALL STUDIES	INDUSTRY-FUNDED	INDUSTRY-FUNDED	NON-INDUSTRY-FUNDED	NON-INDUSTRY-FUNDED		ALL STUDIES	ALL STUDIES	ALL STUDIES	ALL STUDIES		INDUSTRY-FUNDED	INDUSTRY-FUNDED	INDUSTRY-FUNDED	INDUSTRY-FUNDED	INDUSTRY-FUNDED	INDUSTRY-FUNDED	INDUSTRY-FUNDED	INDUSTRY-FUNDED	NON-INDUSTRY-FUNDED	NON-INDUSTRY-FUNDED	NON-INDUSTRY-FUNDED	NON-INDUSTRY-FUNDED	NON-INDUSTRY-FUNDED	NON-INDUSTRY-FUNDED	NON-INDUSTRY-FUNDED	NON-INDUSTRY-FUNDED
Citation	Author & year	Count	Country	Design (Studies that included both observational and interventional components were classified here as intervention trials.)	Observational study	Intervention study	Case Report	Review	Funding sources	Industry Funded?	Industry funded 1 = industry-funded 0 = not industry-funded	Not industry funded or unknown funding. 1 = not industry funded or unknown funding	Unknown funding 1 = unknown funding	Effect on cholesterol is a key objective (Y or N)	Key objective Yes	Key objective No	Key objective and industry funded 0 = no 1 = yes	Comparison	Control group Y = yes N = no	Randomized Y = yes N = no	Adequate control (defined as presence of control group or participants as their own controls or crossover design) 1 = adequate 0 = inadequate	Inadequate control 1 = inadequate 0 = adequate	Adequate control (defined as presence of control group or participants as their own controls or crossover design) 1 = adequate 0 = inadequate	Inadequate control 1 = inadequate 0 = adequate	Adequate control (defined as presence of control group or participants as their own controls or crossover design) 1 = adequate 0 = inadequate	Inadequate control 1 = inadequate 0 = adequate	Duration of exposure period, as reported	Duration of exposure period, in weeks (for mean)	Duration of exposure period, in weeks (for median)	N (completers in exp group) summary (for mean)	N (completers in exp group) summary (for median)		Duration (mean, total) of exposure period, in weeks	Duration (median, total) of exposure period, in weeks	Duration (mean, by decade) of exposure period, in weeks	Duration (median, by decade) of exposure period, in weeks	N (total, mean) (completers in exp group) summary	N (total, median) (completers in exp group) summary	N (by decade, mean) (completers in exp group) summary	N (by decade, median) (completers in exp group) summary	Duration (mean, total) of exposure period, in weeks	Duration (median, total) of exposure period, in weeks	Duration (mean, by decade) of exposure period, in weeks	Duration (median, by decade) of exposure period, in weeks	N (total, mean) (completers in exp group) summary	N (total, median) (completers in exp group) summary	N (by decade, mean) (completers in exp group) summary	N (by decade, median) (completers in exp group) summary
1950s
Gertler MM, Gaam SM, White PD. Diet, serum cholesterol and coronary artery disease. Circulation 1950;2:696-704.	Gertler 1950	1	US	Observational	1				Supported by a grant from the Commonwealth Fund, New York City.	No 1950's	0	1	0	Y	1	0	0
Hardinge MG, Stare FJ. Nutritional studies of vegetarians II. Dietary and serum levels of cholesterol. Am J Clin Nutr 1954;2:83-88	Hardinge 1954	1	US	Observational	1				Supported in part by a grant-in-aid from the Nutrition Foundation, New York.	No 1950's	0	1	0	Y	1	0	0
Keys A, Mickelsen O, Miller EV, Chapman CB.. The relation in man between cholesterol levels in the diet and in the blood. Science. 1950;112(2899):79-81.	Keys 1950	1	US	Intervention trial		1			The work reported here was aided, in part, by grants from the National Dairy Council, acting on behalf of the American Dairy Association, and from the U.S. Public Health Service, Research Grants Division, on recommendation of the Cardiovascular Study Section.	No 1950s	0	1	0	Y	1	0	0	Describes an observational study including men with varying levels of cholesterol intake, followed by a description of a clinical study in 4 volunteers using a cholesterol-free diet.	N	N	0	1			0	1	3w	3	3	4	4										3	3	3	3	4	4	4	4
Messinger WJ, Porosowska Y, Steele JM. Effect of feeding egg yolk and cholesterol on serum cholesterol levels. Arch Intern Med (Chic). 1950 Aug;86(2):189-95.	Messinger 1950	1	US	Intervention trial		1			Supported in part by a research grant from the Division of Research Grants and Fellowships of the National Institutes of Health, United States Public Health Service.	No 1950's	0	1	0	Y	1	0	0	Feeding studies of egg powder or crystalline cholesterol in 4 experiments, using participants as their own controls, for effect on lipids.	Participants served as their own controls.	N	1	0			1	0	Durations ranged from 42-50d.	7	7	29	29										7	7	7	7	29	29	29	29
Kinsell LW, Michaels GD, Partridge JW, Boling LA, Balch HE, Cochrane GC. Effect upon serum cholesterol and phospholipids of diets containing large amounts of vegetable fat. J Clin Nutr. 1953;1:224.	Kinsell 1953	1	US	Intervention trial		1			This work has been supported in part by grants from the National Institutes of Health and the Armour Laboratories	No 1950's	0	1	0	Y	1	0	0	Feeding studies in individual patients (not a randomized trial), for effects on lipids.	N	N	0	1			0	1	Variable (series of 1-participant studies)
Mayer GA, F. C. W., De Wolfe MS, Beveridge JMR. (1954). "Diet and plasma cholesterol levels." Am J Clin Nutr 2: 316-321.	Mayer 1954	1	Canada	Intervention trial		1			This investigation was supported by a grant from the J. P. Bickell Foundation, Toronto, Canada.	No 1950's	0	1	0	Y	1	0	0	Sequential comparison of 4 diets varying in fat and chol, for effects on lipids.	Participants were their own controls.	N	1	0			1	0	1w on high-chol diet	1	1	5	5										1	1	1	1	5	5	5	5
Keys, A. J., J. T. Anderson, 0. Mickelson, S. F. Adelson and F. Fidanza. (1956). "Diet and serum cholesterol: lack of effect of dietary cholesterol." J. Nutr. 59: 39.	Keys 1956	1	US	Intervention trial		1			This investigation was supported by the United States Public Health Service and National Dairy Council.	No 1950's	0	1	0	Y	1	0	0	Crossover comparison of "house diet" and egg, or "house diet" and diet with margarine. Also, test of switching from egg diet to margarine diet. Also, a crossover experiment using "pure" (presumably crystalline) chol.	Crossover	N	1	0			1	0	4w	4	4	11	11										4	4	4	4	11	11	11	11
Bronte-Stewart B, Antonis A, Eales L, Brock JF. Effects of feeding different fats on serum cholesterol level. Lancet. 1956;i:521-526.	Bronte-Stewart 1956	1	South Africa	Intervention trial		1			Unknown funding	Unknown 1950's	0	1	1	Y	1	0	0	Feeding studies using 10 eggs/d and various fats, for effects on lipids.	N	N	0	1			0	1	10d	1.5	1.5	2	2										1.5	1.5	1.5	1.5	2	2	2	2
Gordon M, Wilkens J, Brook JF. Serum cholesterol levels after consuming eggs with increased content of unsaturated lipids. Lancet. 1958;ii:244	Gorden 1958	1	South Africa	Intervention trial		1			Unknown	Unknown 1950's	0	1	1	Y	1	0	0	Sequential feeding studies: (1) no eggs vs 10 egg yolks/d for 10d, (2) no eggs vs 10 egg yolks/d for 7d, for effects on lipids.	N	N	0	1			0	1	10d and 7d	1	1	2	2										1	1	1	1	2	2	2	2
Totals 1950s		9	0		2	7	0	0		Totals 1950s	0	9	2	Totals 1950s	9	0	0				3	4	0	0	3	4																	2.91667	2.25			8.83333	4.5
1960s
Taylor CB, Patton D, Yogi N, Cox GE. Diet as source of serum cholesterol in man. Proc Soc Exp Biol Med. 1960;103:768.	Taylor 1960	1	US	Intervention trial		1			unknown	Unknown 1960's	0	1	1	Y	1	0	0	Two uncontrolled studies of radiolabelled chol, including consumption of (1) 10g egg yolk in 4 participants for 8w, and (2) 20g egg yolk in 7 participants for 8w to assess the proportion of circulating chol that comes from diet.	N	N	0	1			0	1	8w	8	8	11	11										8	8	8	8	11	11	11	11
Horlick L, O'Neil JB. Effect of modified egg-yolk fats on blood-cholesterol levels. Lancet. 1960;Feb 20;1(7121):438.	Horlick 1960	1	Canada	Intervention trial		1			unknown funding	Unknown 1960's	0	1	1	Y	1	0	0	Series of uncontrolled feeding trials using 10 eggs/d in 2 volunteers, using normal eggs and PUFA-enriched eggs, then 24 yolks/d in a formula diet, for effects of serum chol.	N	N	0	1			0	1	2w, done twice with basal diet and then again with formula diet.	2	2	2	2										2	2	2	2	2	2	2	2
Connor, W. E., R. E. Hodges, and R. E. Bleiler. (1961). "The effect of dietary cholesterol upon serum lipids in man." J. Lab. Clin. Med. 57: 331.	Connor 1961a	1	US	Intervention trial		1			Supported by research grants from the American and Iowa Heart Associations, the National Institute of Health, the Nutrition Foundation, the National Vitamin Foundation, and the American Cancer Society	No 1960's	0	1	0	Y	1	0	0	Crossover comparison of a high- and zero-chol diets. High-chol diet included 1,650, 1,900, or 4,800 mg chol/d for 3 participants and 2,400 mg/d for the remaining 3 participants.	Crossover	Not specified	1	0			1	0	75d for one group and 23d for the other	11	11	6	6										11	11	11	11	6	6	6	6
Connor, W. E., Hodges, R.E. and Bleller, R.E., (1961). "The serum lipids in men receiving high cholesterol and cholesterol-free diets." J. Clin. Invest, 40 (1961): 894	Connor 1961b	1	US	Intervention trial		1			Supported by research grants from the National Institutes of Health, the American and Iowa Heart Associations, the Nutrition Foundation, the National Vitamin Foundation, and the American Cancer Society.	No 1960's	0	1	0	Y	1	0	0	Sequential comparison of chol-free and high-chol diets containing 475, 950, or 1,425 mg egg yolk chol/d for effects on lipids. Then did similar test with crystalline chol.	Participants were their own controls.	N	1	0			1	0	3w	3	3	6	6										3	3	3	3	6	6	6	6
Wells WM, and Bronte-Stewart B. (1963). "Egg yolk and serum cholesterol levels: importance of dietary cholesterol intake." Br Med J 1: 577-581.	Wells 1963	1	South Africa	Intervention trial		1			This investigation was undertaken as part of the programme of the Clinical Nutrition Research Unit, which is under the direction of Professor J. F. Brock and is supported in the University of Cape Town by the Council for Scientific and Industrial Research of South Africa. It was also supported in part by research grant PHS: H-3316 from the National Heart Institute, Public Health Service, U.S.A.	No 1960's	0	1	0	Y	1	0	0	Uncontrolled egg-yolk feeding tests in a single individual, with follow-up tests in 2 more, to assess the effects of egg yolk on serum chol.	N	N	0	1			0	1	10d	1.5	1.5	1	1										1.5	1.5	1.5	1.5	1	1	1	1
Bhattatiry EPM, Siperstein MD. Feedback control of cholesterol synthesis in man. J Clin Invest. 1963;42:1613	Bhattatiry 1963	1	US	Intervention trial		1			This study was supported by grants from Dallas Heart Association, Texas Heart Association, and American Heart Association.	No 1960's	0	1	0	N	0	1	0	Study of high-chol diets in individuals with cirrhosis or cancer undergoing liver biopsy, aiming to quantify inhibition of chol synthesis in liver samples.	N	N	0	1			0	1	3d	0.5	0.5	4	4										0.5	0.5	0.5	0.5	4	4	4	4
Connor WE, Daniel B. Stone, and Robert E. Hodges (1964 Aug; ). "The Interrelated Effects of Dietary Cholesterol and Fat upon Human Serum Lipid Levels." J Clin Invest. 43(8): 1691–1696.	Connor 1964	1	US	Intervention trial		1			Supported by U. S. Public Health Service research grants H-7239, H-4621, and AM 06090, and by the Iowa Heart Association.	No 1960's	0	1	0	Y	1	0	0	Sequential comparison of 4 diets: (1) high-chol, high-SFA, (2) zero-chol, high-SFA, (3) zero-chol, low-SFA, and (4) high-chol, low-SFA, for effects on serum lipids.	Participants were their own controls.	N	1	0			1	0	4w	4	4	6	6										4	4	4	4	6	6	6	6
Erickson, B., R. Coots, F. Mattson, and A. Kligman. (1964). "The effect of partial hydrogenation of dietary fats, of the ratio of polyunsaturated to saturated fatty acids, and of dietary cholesterol upon plasma lipids in man." J. Clin. Invest. 43:2017-2025.	Erickson 1964	1	US	Intervention trial		1			Unknown funding. Presented in part at the annual meeting of the Council on Arteriosclerosis, American Heart Association, Los Angeles, Calif., October 24, 1963.	Unknown 1960's	0	1	1	Y	1	0	0	Sequential test of diets varying in fat and chol content for effects on lipids.	Participants were their own controls.	N	1	0			1	0	5w	5	5	36	36										5	5	5	5	36	36	36	36
Grande F, Anderson JT, Chlouverakis C, Proja M, Keys A. (1965). "Effect of dietary cholesterol on man’s serum lipids." J Nutr Biochem 87: 52-62.	Grande 1965	1	US	Intervention trial		1			Supported in part by research grants from the U.S. Public Health Seryice (HE-04401) and from the American Heart Association.	No 1960's	0	1	0	Y	1	0	0	Crossover trial, incorporating 3 studies: (1) comparison or 3 levels of dietary crystalline chol (0, 500, or 1500 mg) or 500 mg egg yolk chol, (2) comparison of 0 or 1500 mg chol in 2 different types of fat, and (3) comparison of 0 or 1500 mg crystalline chol in low-fat cookies, all for effects on lipids.	Crossover	N	1	0			1	0	3w on each diet	3	3	6	6										3	3	3	3	6	6	6	6
Hegsted DM, M. R., Myers ML, Stare FJ., (1965 Nov). "Quantitative effects of dietary fat on serum cholesterol in man." Am J Clin Nutr. 17(5): 281-295.	Hegsted 1965	1	US	Intervention trial		1			This study was supported in part by grants-in-aid from the Jots, A. Hartford Memorial Fund, the Special Dairy Industry Board, the U. S. Public Health Service (5-KG-AM 18,455 and AM-06245), the Nutrition Foundation, Inc., and the Fund for Research and Teaching, Department of Nutrition, Harvard School of Public Health.	No 1960's	0	1	0	Y	1	0	0	Crossover trial comparing fats varying in saturation, and high and low chol content from egg yolk for effects on lipids.	Crossover	Not specified	1	0			1	0	4w for each diet period	4	4	20	20										4	4	4	4	20	20	20	20
Wilson, J. D., and C. H. Lindsey, Jr. (1965). "Studies on the influence of dietary cholesterol on cholesterol metabolism in isotopic steady state in man." J. Clin. Invest. 44: 1805.	Wilson 1965	1	US	Intervention trial		1			Supported by grants from the U. S. Public Health Service and the American Heart Association.	No 1960's	0	1	0	Y	1	0	0	Studies of chol metabolism in 2 men fed varying diets, to assess changes in chol absorption, synthesis, and degradation to bile acids.	N	N	0	1			0	1	21-40d	4.5	4.5	2	2										4.5	4.5	4.5	4.5	2	2	2	2
Taylor CB, Mikkelson B, Anderson JA, Forman DT. Human serum cholesterol synthesis measured with the deuterium level. Arch Pathol. 1966;81:213.	Taylor 1966	1	US	Intervention trial		1			Supported by the National Institutes of Health, Department of Health, Education, and Welfare (Graduate Research Training grant); the Chicago, Illinois and American Heart Associations; the Glenview Area United Fund, Glenview, Ill; the Life Insurance Medical REsearch Fund; the Thomas J. Dee and the George C. Moody Memorial Funds of Evanston Hospital, and the Dr. Gladys Henry Dick Memorial Pathology…	No 1960's	0	1	0	Y	1	0	0	Sequential chol-feeding studies in 5 participants, assessing effects on chol synthesis.	Participants were their own controls.	N	1	0			1	0	4-6w	5	5	3	3										5	5	5	5	3	3	3	3
Splitter, S. D., et al. (1968). "Evaluation of the effects of egg yolk lipids upon plasma lipids in human subjects." Metabolism 17(12): 1129-1139.	Splitter 1968	1	US	Intervention trial		1			National Institute of Health, The Safflower Council of the National Institute of Oilseed Products and Mead Johnson Research Laboratories	No 1960's	0	1	0	Y	1	0	0	Individualized diet tests in 6 participants, and test of regular eggs vs eggs from hens fed safflower oil, for effects on lipids in 7 participants, along with a hypocaloric diet.	N	N	0	1			0	1	Variable			13	13														13	13	13	13
National Diet-Heart Study Research Group. The National Diet-Heart Study Final Report, Chapter 17. Circulation 1968;37(Suppl 3): 1-260.	NDHS 1968	1	US	Intervention trial		1			Apparently supported in part by Research Career Development Award HL00287 to David Jacobs.	No 1960s	0	1	0	Y	1	0	0	Crossover comparison of diets high or low in sat fat and with egg or imitation (chol-free) egg.	Crossover	Y	1	0			1	0	3w and 10w	6.5	6.5	187	187										6.5	6.5	6.5	6.5	187	187	187	187
Totals 1960s		14			0	14	0	0		Totals 1960s	0	14	3	Total 1960s	13	1	0				8	6	0	0	8	6																	4.46154	4			21.6429	6
1970s
Sacks FM, Castelli WP, Donner A, Kaas EH. Plasma lipids and lipoproteins in vegetarians and controls. N Eng J Med. 1975;292:1148-1151.	Sacks 1975	1	US	Observational	1				Supported by a grant from the National Institue of Child Health and Human Development and a training grant from the National Institute of Allergy and Infectious Diseases	No 1970's	0	1	0	Y	1	0	0
Connor, W. E., Cerqueira, M. T., Connor, R. W., Wallace, R. B., Malinow, M. R., and Casdorph, H. R. (1978). "The plasma lipids, lipoproteins, and diet of the Tarahumara Indians of Mexico." Am. J. Clin. Nutr., 31: 1131-1142.	Connor 1978	1	Mexico	Observational	1				Supported by United States Public Health Service Research Grants HL-14230, HL-19130, and HL- 06336 from the National Heart and Lung Institute; and by the General Clinical Research Centers Program (RR-334 and RR-59) of the Division of Research Resources of the National Institutes of Health	No 1970's	0	1	0	Y	1	0	0
Rhomberg HP, B. H. (1976). "Excessive egg consumption, xanthomatosis and cholesterolaemia." Br MedJ 1: 1189-1189.	Rhomberg 1976	1	Austria	Case Report			1		Unknown funding.	Unknown 1970's	0	1	1	Y	1	0	0	Case report
Dam, H., I. Prange, et al. (1971). "Studies on human bile. IV. Influence of ingestion of cholesterol in the form of eggs on the composition of bile in healthy subjects." Z Ernahrungswiss 10(3): 178-187.	Dam 1971	1	Denmark	Intervention trial		1			Unknown funding	Unknown 1970's	0	1	1	N	0	1	0	Uncontrolled study of the effect of 5-10 eggs/d on bile.	N	N	0	1			0	1	6w	6	6	9	9										6	6	6	6	9	9	9	9
Mattson, F. H., et al. (1972). "Effect of dietary cholesterol on serum cholesterol in man." Am J Clin Nutr 25(6): 589-594.	Mattson 1972	1	US	Intervention trial		1			unknown funding	Unknown 1970's	0	1	1	Y	1	0	0	Parallel comparison of diets containing 4 levels of chol, for their effects on serum chol.	Y	N	1	0			1	0	6w	6	6	29	29										6	6	6	6	29	29	29	29
Takeuchi, N. and Y. Yamamura (1974). "Effects of egg yolk and moctamide on serum lipids in man." Clin Pharmacol Ther 16(2): 368-375.	Takeuchi 1974	1	Japan	Intervention trial		1			The work was supported by a research grant for atherosclerosis in Japan. Moctamide was supplied by the Pharmaceutical Division of Sumitomo Chemical Company (Osaka).	No 1970's	0	1	0	Y	1	0	0	Uncontrolled evaluation of effect of 9 eggs/d, followed by test of lipid-lowering effects of moctamide.	N	N	0	1			0	1	14d	2	2	41	41										2	2	2	2	41	41	41	41
Slater, G., Mead, J., Dhopeshwarksr. G.. Robinson, S. and Alfin-Skater, R.B., (1976). "Plasma cholesterol and triglycerides in men with added eggs in the diet." Nutr. Reports Intern., 14(1976): 249.	Slater 1976	1	US	Intervention trial		1			This study was supported by the Egg Program of the Department of Agriculture of the state of California.	Yes 1970's	1	0	0	Y	1	0	1	A series of experiments: (1) young men (20-30yo) fed 2 eggs/d x 6w, (2) 21 middle-aged men (41-66yo) fed 1 egg/d x 5w and 2 eggs/d x 3 weeks, (3) young men (mean 24yo) fed 2 eggs/d x 8w, for effects on lipids.	Each participant served as own control.	N	1	0	1	0			6w, 8w, 8w	8	8	61	61		8	8	8	8	61	61	61	61
Nestel, P. J. and A. Poyser (1976). "Changes in cholesterol synthesis and excretion when cholesterol intake is increased." Metabolism 25(12): 1591-1599.	Nestel 1976	1	Australia	Intervention trial		1			National Heart Association of Australia	No 1970's	0	1	0	Y	1	0	0	Within-participant comparison of diets with and without 500mg of egg yolk cholesterol, for effects on lipid metabolism.	Participants were their own controls.	N	1	0			1	0	4-6w	5	5	9	9										5	5	5	5	9	9	9	9
Mistry, P., A. Nicoll, C. Niehaus, I. Chrystie, E. Janus, H. Strain and B. Lewis (1977). "Effects of dietary cholesterol on serum lipoproteins in man. In: Protides of Biological Fluids, edited by H. Peeters." Oxford: Pergamon Press, vol. 25.	Mistry 1977	1	UK	Intervention trial		1			Unknown	Unknown 1970's	0	1	1	Y	1	0	0	Uncontrolled study giving egg yolk chol (750mg to 14 participants and 1500mg to 4 participants) for 10d, for effects on lipids.	N	N	0	1			0	1	10d	1.5	1.5	18	18										1.5	1.5	1.5	1.5	18	18	18	18
Morris ML, Fuller FM, Bruce VM, MacDonald BE. (1977). "Absorption of cholesterol from eggs and the effect on serum cholesterol level in men." J Can Diet Assoc 38: 58.	Morris 1977	1	Canada	Intervention trial		1			Supported in part through a grant from the Canadian Egg Marketing Association.	Yes 1970's	1	0	0	Y	1	0	1	Study giving 0, 1, 2, 3, or 6 eggs/d to participants for 3w, then crossing to one of the other egg regimens; each participant had 2 diet phases, for effects on lipids.	Y	Y	1	0	1	0			3w	3	3	10	10		3	3	3	3	10	10	10	10
Kummerow, F. A., et al. (1977). "The influence of egg consumption on the serum cholesterol level in human subjects." Am J Clin Nutr 30(5): 664-673.	Kummerow 1977	1	US	Intervention trial		1			unknown funding	Unknown 1970's	0	1	1	Y	1	0	0	3 different trials: In Urbana, 30 heart patients were compared with 30 other patients in a 5h test of an egg meal. In Prague, 21 hospital patients participated in 7d tests of a diet with and without 2 added eggs. In Sofia, 20 patients with acquired heart problems were compared with 20 patients with congenital heart defects in a 54d test of 2 added eggs/d.	Y, in Sophia	N	1	0			1	0	Urbana 5h; Prague 7d; Sophia 54d			121	121														121	121	121	121
Porter, M. W., et al. (1977). "Effect of dietary egg on serum cholesterol and triglyceride of human males." Am J Clin Nutr 30(4): 490-495.	Porter 1977	1	US	Intervention trial		1			Agriculture Experiment Station , School of Medicine, University of Missouri-Columbia, and the Missouri Egg Merchandising Council and the National Commision of Egg Nutrition	Yes 1970's	1	0	0	Y	1	0	1	Crossover comparison of 0 or 1 added egg/d for effects on lipids.	Crossover	Not specified	1	0	1	0			12w	12	12	114	114		12	12	12	12	114	114	114	114
Raymond, T. L., et al. (1977). "The interaction of dietary fibers and cholesterol upon the plasma lipids and lipoproteins, sterol balance, and bowel function in human subjects." J Clin Invest 60(6): 1429-1437.	Raymond 1977	1	US	Intervention trial		1			U. S. Public Health Service grants from the National Heart and Lung Institute and by the General Clinical Research Centers Program of the Division of Research Resources of the National Institutes of Health, and a grant from CPC International (Corn Products Refinind Company--large food company)	No 1970's	0	1	0	Y	1	0	0	Comparison of 0 mg and 1000 mg chol from egg yolks as part of a study of fiber's effects on lipids.	Participants were their own controls.	Not specified	1	0			1	0	4w	4	4	6	6										4	4	4	4	6	6	6	6
Whyte, M., et al. (1977). "Cholesterol metabolism in Papua New Guineans." Eur J Clin Invest 7(1): 53-60.	Whyte 1977	1	Australia and Papau New Guinea	Intervention trial		1			National Heart Foundation of Australia	No 1970's	0	1	0	Y	1	0	0	Uncontrolled test of egg yolk (1g chol) in 6 men for 5w for effects on lipids.	N	N	0	1			0	1	5w	5	5	6	6										5	5	5	5	6	6	6	6
Kaufman, T., et al. (1978). "Effect of an egg-rich diet on plasma lipids and proteins in severely burned patients." Isr J Med Sci 14(7): 732-740.	Kaufman 1978	1	Israel	Intervention trial		1			unknown funding	Unknown 1970's	0	1	1	Y	1	0	0	Uncontrolled study of lipids in burn patients fed 35 eggs/d.	N	N	0	1			0	1	30d	4	4	8	8										4	4	4	4	8	8	8	8
Mahley, R. W., et al. (1978). "Alterations in human high-density lipoproteins, with or without increased plasma-cholesterol, induced by diets high in cholesterol." Lancet 2(8094): 807-809.	Mahley 1978	1	US	Intervention trial		1			American Egg Board	Yes 1970's	1	0	0	Y	1	0	1	In exp 1, 6 participants ate 4-6 eggs/d x 4w. In exp 2, 5 participants ate 1, 2, and 3 eggs/d in succeeding 6w periods. Effects on HDL were measured.	N	N	0	1	0	1			Exp 1: 4w; exp 2: 18w.	4	4	6	6		4	4	4	4	6	6	6	6
Applebaum-Bowden, D., W. R. Hazzard, et al. (1979). "Short-term egg yolk feeding in humans. Increase in apolipoprotein B and low density lipoprotein cholesterol." Atherosclerosis 33(4): 385-396.	Applebaum-Bowden 1979	1	US	Intervention trial		1			This research was supported by National Heart, Lung and Blood Institute Contract HV 12157 (North-west Lipid Research Clinic), the American Egg Board. National Institutes of Health Grant RR-133 (University of Washington Clinical Research Center at Harborview Medical Center) aud National Heart, Lung and Blood Institute Grant HL 18291 (Estrogen Effects). Dr. Hazzard is an investigator and Dr. Appleb…	Yes 1970's	1	0	0	Y	1	0	1	Uncontrolled study of egg-based formula (about 20 yolks/d) in 4 participants for 30d.	N	N	0	1	0	1			30d	4	4	4	4		4	4	4	4	4	4	4	4
Bronsgeest-Schoute, D. C., J. G. Hautvast, et al. (1979) Dependence of the effects of dietary cholesterol and experimental conditions on serum lipids in man. I. Effects of dietary cholesterol in a linoleic acid-rich diet. Am J Clin Nutr 2183-2187	Bronsgeest-Schoute 1979a	1	The Netherlands	Intervention trial		1			Supported in part by the Netherlands Heart Foundation Grant 75051.	No 1970's	0	1	0	Y	1	0	0	Crossover comparison of a linoleic-acid-rich diet with and without 2 added eggs/d, for effect on lipids.	Crossover	Y	1	0			1	0	4w	4	4	41	41										4	4	4	4	41	41	41	41
Bronsgeest-Schoute, D. C., R. J. Hermus, et al. (1979) Dependence of the effects of dietary cholesterol and experimental conditions on serum lipids in man. II. Effects of dietary cholesterol in a linoleic acid-poor diet. Am J Clin Nutr 2188-2192	Bronsgeest-Schoute 1979b	1	The Netherlands	Intervention trial		1			Supported in part by the Netherlands Heart Foundation Grant 75051.	No 1970's	0	1	0	Y	1	0	0	Crossover comparison of a linoleic-acid-poor diet with and without 2 added eggs/d, for effect on lipids.	Crossover	Y	1	0			1	0	3w	3	3	18	18										3	3	3	3	18	18	18	18
Bronsgeest-Schoute, D. C., R. J. Hermus, et al. (1979). "Dependence of the effects of dietary cholesterol and experimental conditions on serum lipids in man. III. The effect on serum cholesterol of removal of eggs from the diet of free-living habitually egg-eating people." Am J Clin Nutr 32(11): 2193-2197.	Bronsgeest-Schoute 1979c	1	The Netherlands	Intervention trial		1			Supported in part by the Netherlands Heart Foundation Grant 75051.	No 1970's	0	1	0	Y	1	0	0	Controlled trial of removal of eggs, for effects on lipids	Y	N	1	0			1	0	3w	3	3	44	44										3	3	3	3	44	44	44	44
Flynn, M. A., G. B. Nolph, et al. (1979) Effect of dietary egg on human serum cholesterol and triglycerides. American journal of clinical nutrition 1051-1057	Flynn 1979	1	US	Intervention trial		1			Supported by the School of Medicine, the Agriculture Experiment Station, University of Missouri-Columbia and the American Egg Board.	Yes 1970's	1	0	0	Y	1	0	1	Crossover comparison of 0 or 2 added eggs/d for effects on lipids.	Crossover	Not specified	1	0	1	0			12w	12	12	116	116		12	12	12	12	116	116	116	116
Totals 1970s		21	0		2	18	1	0		Totals 1970s	6	15	6	Totals 1970s	20	1	6				11	7	4	2	7	5									7.16667	6			51.8333	35.5			3.95455	4			29.1667	18
1980s
Ueshima H, Iida M, Shimamoto T, et al. Dietary Intake and Serum Total Cholesterol Level: Their Relationship to Different Lifestyles in Several Japanese Populations. Circulation 1982; 66:519-526.	Ueshima 1982	1	Japan	Observational	1				unknown	Unknown 1980's	0	1	1	Y	1	0	0
Barrett-Connor, E., L. Suarez, et al. (1982). "Spouse concordance of plasma cholesterol and triglyceride." J Chronic Dis 35(5): 333-340.	Barrett-Connor 1982	1	US	Observational	1				Research supported by National Institutes of Health, Contract No. NIH-NHLBI-HV-1-2160-L; American Heart Association, California Affiliate, Grant-in-Aid No. SO-S1 14.	No 1980's	0	1	0	N	0	1	0
Dawber, T. R., R. J. Nickerson, et al. (1982). "Eggs, serum cholesterol, and coronary heart disease." Am J Clin Nutr 36(4): 617-625.	Dawber 1982	1	US	Observational	1				Supported in part by a grant from the American Egg Board.	Yes 1980's	1	0	0	Y	1	0	1
Liebman M, Bazzarre TL. Plasma lipids of vegetarian and non-vegetarian males: effect of egg consumption. Am J Clin Nutr. 1983;38:612.	Liebman 1983	1	US	Observational	1				Supported in part by a grant from the American Egg Board and by the North Carolina Agricultural Research Service, Raleigh NC	Yes 1980's	1	0	0	Y	1	0	1
Kritchevsky, D., et al. (1984). "Diet, nutrition intake, and metabolism in populations at high and low risk for colon cancer. Relationship of diet to serum lipids." Am J Clin Nutr 40(4 Suppl): 921-926.	Kritchevsky 1984	1	US	Observational	1				National Cancer Institute, National Institutes of Health and Commonwealth of Pennsylvania	No 1980's	0	1	0	Y	1	0	0
Faber, M., A. J. Benade, et al. (1986). "Dietary intake, anthropometric measurements, and blood lipid values in weight training athletes (body builders)." Int J Sports Med 7(6): 342-346.	Faber 1986	1	South Africa	Observational	1				Supported in part by grants from the South African Egg Board.	Yes 1980's	1	0	0	Y	1	0	1
Green, M. S. and E. Jucha (1986). "Association of serum lipids with coffee, tea, and egg consumption in free-living subjects." J Epidemiol Community Health 40(4): 324-329.	Green 1986	1	Israel	Observational	1				This study was supported by a grant from the Committee For Prevention And Research In Occupational Health, Israel Ministry Of Labour And Social Affairs, Jerusalem.	No 1980's	0	1	0	Y	1	0	0
Vorster, H. H., et al. (1987). "Serum cholesterol, lipoproteins, and plasma coagulation factors in South Africa blacks on a high-egg but low-fat intake." Am J Clin Nutr 46(1): 52-57.	Vorster 1987	1	South Africa	Observational	1				South African Medical Research Council	No 1980's	0	1	0	Y	1	0	0
Vorster, H. H., et al. (1988). "Influence of a habitual high egg intake on serum lipid levels in a rural coloured population." S Afr Med J 74(11): 554-559.	Vorster 1988	1	South Africa	Observational	1				unknown funding	Unknown 1980's	0	1	1	Y	1	0	0
Ellis, M. E. and D. L. Stevens (1981). "Transient cerebral ischaemic attacks related to egg consumption." Postgrad Med J 57(672): 642-644.	Ellis 1981	1	England	Case Report			1		funding unknown	Unknown 1980's	0	1	1	N	0	1	0	Case report
Lin, D. S., and Connor, W. E. (1980). "The long term effects of dietary cholesterol upon the plasma lipids, lipoproteins, cholesterol absorption, and the sterol balance in man: the demonstration of feedback inhibition of cholesterol biosynthesis and increased bile acid excretion." J Lipid Res, 21: 1042-1052.	Lin 1980	1	US	Intervention trial		1			Supported by U.S. Public Health Service Grants HL- 19130 and HI,-16336 from the National Heart and Lung Institute and by the General Clinical Research Centers Program (RR-334 and RR-59) of the Division of Research Resources of the National Institutes of Health.	No 1980's	0	1	0	Y	1	0	0	Measured chol biosynthesis and excretion during low- and high-chol diet.			0	1			0	1	10-14w of low-chol diet and 11w of high-chol diet.	11	11	2	2										11	11	11	11	2	2	2	2
Tan MH, Dickinson MA, Albers JJ, Havel RJ, Cheung MC & Vigne JL (1980). "The effect of a high cholesterol and saturated fat diet on serum high-density lipoprotein-cholesterol, apoprotein A-I, and apoprotein E levels in normolipidemic humans." Am. J. Clin. Nutr. 33: 2559 ± 2565.	Tan 1980	1	Unclear; US or Canada	Intervention trial		1			Supported in part by a grant from the Nova Scotia Heart Foundation, United States Public Health Service Grant HL-14237 (Arteriosclerosis SCOR) HLHV l2157A, and HL 22285 from the Lipid Metabolism Branch, NHLBI.	No 1980's	0	1	0	Y	1	0	0	Single-arm comparison of low-chol, high-PUFA diet and high-chol, high-SFA diet			0	1			0	1	1w on low-chol, high-PUFA diet, then 3w on high-chol, high-SFA diet	3	3	6	6										3	3	3	3	6	6	6	6
O'Brien, B. C. and R. Reiser (1980) Human plasma lipid responses to red meat, poultry, fish, and eggs. Am J Clin Nutr 33, 2573-2580	O'Brien 1980	1	US	Intervention trial		1			Wallace Genetic Foundation	No 1980's	0	1	0	Y	1	0	0	Crossover comparison of 4 diet phases: red meat + 3 eggs/d, red meat + 0 eggs, white meat + 3 eggs/d, or white meat + 0 eggs, for effects on lipids.			1	0			1	0	6w per phase	6	6	29	29										6	6	6	6	29	29	29	29
Ginsberg H, L. N., Mays C, Gibson J, Brown WV. (1981). "Lipoprotein metabolism in nonresponders to increased dietary cholesterol." Arteriosclerosis 1: 463–470.	Ginsberg 1981	1		Intervention trial		1			This work was supported by NIH Grant from NHLBI; by a grant from the Division of Research Resources, General Clinical Research Centers Branch, and by a grant from the American Egg Board.	Yes 1980's	1	0	0	Y	1	0	1	Uncontrolled comparison of low- and high-chol diets for their effects on lipids.			0	1	0	1			4-5w in each period, lipids determined after 2-3w.	3	3	5	5		3	3	3	3	5	5	5	5
Chenoweth, W., M. Ullmann, et al. (1981) Influence of dietary cholesterol and fat on serum lipids in men. Journal of nutrition 2069-2080	Chenoweth 1981	1	US	Intervention trial		1			Supported in part by the Michigan Agricultural Experiment Station (Journal Article Number 9400) and by Standard Brands, Inc.	No 1980's	0	1	0	Y	1	0	0	2 separate crossover comparisons: one of a 42-45%-fat diet with and without the addition of 2 eggs/d, and another of a 35%-fat diet w/ lower P/S ratio with and without the addition of 2 eggs/d.			1	0			1	0	4w for each phase	4	4	16	16										4	4	4	4	16	16	16	16
Flaim, E., L. F. Ferreri, et al. (1981) Plasma lipid and lipoprotein cholesterol concentrations in adult males consuming normal and high cholesterol diets under controlled conditions. American journal of clinical nutrition 1103-1108	Flaim 1981	1	US	Intervention trial		1			Supported in part by a grant from the American Egg Board, Park Ridge, Illinois.	Yes 1980's	1	0	0	Y	1	0	1	Parallel comparison of 400mg chol/d vs 1400mg chol/d for effects on lipids.			1	0	1	0			4w	4	4	23	23		4	4	4	4	23	23	23	23
McMurry, M. P., et al. (1981). "The effects of dietary cholesterol upon the hypercholesterolemia of pregnancy." Metabolism 30(9): 869-879.	McMurry 1981	1	US	Intervention trial		1			U.S. Public Health Service; National Heart Lung and Blood Institute; National Institiute of Health	No 1980's	0	1	0	Y	1	0	0	Crossover comparison of zero-cholesterol and high-cholesterol (600mg/d) diets during pregancy, for their effects on serum cholesterol concentrations.			1	0			1	0	4-9w diet periods	6.5	6.5	14	14										6.5	6.5	6.5	6.5	14	14	14	14
Mistry, P., et al. (1981). "Individual variation in the effects of dietary cholesterol on plasma lipoproteins and cellular cholesterol homeostasis in man. Studies of low density lipoprotein receptor activity and 3-hydroxy-3-methylglutaryl coenzyme A reductase activity in blood mononuclear cells." J Clin Invest 67(2): 493-502.	Mistry 1981	1	Author from US but was in England doing research	Intervention trial		1			Research Endowments Committee of St. Thomas' Hospital.	No 1980's	0	1	0	Y	1	0	0	2 uncontrolled studies of effects of increased dietary chol on plasma lipids.			0	1			0	1	Study A 14d (37 Ss), Study B 28d (14 Ss).	2	2	51	51										2	2	2	2	51	51	51	51
Roberts, S. L., et al. (1981). "Does egg feeding (i.e., dietary cholesterol) affect plasma cholesterol levels in humans? The results of a double-blind study." Am J Clin Nutr 34(10): 2092-2099.	Roberts 1981	1	US	Intervention trial		1			USPHS, National Heart Lung and Blood Institute, and NIH	No 1980's	0	1	0	Y	1	0	0	Crossover comparison of 1/2 cup whole eggs vs egg substitute for effect on lipids			1	0			1	0	4w	4	4	16	16										4	4	4	4	16	16	16	16
Schonfeld G, Patsch W., Rudel IX, Nelson C, Epstein W, Olson RE. (1982). "Effects of dietary cholesterol and fatty acids on plasma lipoproteins." J Clin Invest 69: 1072-1080.	Schonfeld 1982	1	US	Intervention trial		1			This work was supported in part by National Institutes of Health grants HL-15308, HL-24743, and HL-24736; Lipid Research contract NO1-HV-2-29162; and a grant from the American Egg Board, Chicago, IL.	Yes 1980's	1	0	0	Y	1	0	1	Uncontrolled trial of addition of 3 eggs and of 6 eggs for effects on lipids.			0	1	0	1			4-5w on 3 eggs, followed by 4-6w on 6 eggs	5	5	20	20		5	5	5	5	20	20	20	20
Tall AR, Blum CB, Forester GP, Nelson CA. Changes in the distribution and composition of plasma high density lipoproteins after ingestion of fat. J Biol Chem. 1982;257:198-207.	Tall 1982	1	US	Intervention trial		1			This research was supported by grants from the National Institutes of Health and by a grant-in-aid from the American Heart Association	No 1980's	0	1	0	Y	1	0	0	Comparison of postprandial effects of corn oil vs corn oil + 4 eggs on HDL.			1	0			1	0	8h	0	0	6	6										0	0	0	0	6	6	6	6
Nestle P, Tada N, Billington T, Huff M, Fidge N. Changes in very low density lipoproteins with cholesterol loading in man. Metab Clin Exp. 1982;31:398-405.	Nestle 1982	1	Australia	Intervention trial		1			Supported in part by Grants from the National Health and Medical Research Council and the National Heart Foundation of Australia	No 1980's	0	1	0	Y	1	0	0	Uncontrolled comparison of 2 diets, one with approx 200 mg chol and the other with approx 1700 mg chol for effects on VLDL.			0	1			0	1	1w on 200 mg chol, and 4w on 1700 mg chol.	4	4	6	6										4	4	4	4	6	6	6	6
Booth, S. and R. W. Lacey (1982). "Effect of recent food on estimation of high-density lipoprotein and total cholesterol in normal subjects." Ann Clin Biochem 19(3): 176-181.	Booth 1982	1	England	Intervention trial		1			funding unknown	Unknown 1980's	0	1	1	Y	1	0	0	Postprandial assessment of effect of 4 eggs on lipids.			0	1			0	1	7h	0	0	18	18										0	0	0	0	18	18	18	18
Buzzard, I. M., M. R. McRoberts, et al. (1982) Effect of dietary eggs and ascorbic acid on plasma lipid and lipoprotein cholesterol levels in healthy young men. Am J Clin Nutr. 1982;36:94-105	Buzzard 1982	1	US	Intervention trial		1			Supported in part by a grant from the Wallace Genetic Foundation, West Des Moines, IA. The authors gratefully acknowledge the personal interest and support of H. B. Wallace.	No 1980's	0	1	0	Y	1	0	0	Parallel comparison of (1) eggs, (2) ascorbic acid, (3) eggs + ascorbic acid, and (4) placebo.			1	0			1	0	6w	6	6	10	10										6	6	6	6	10	10	10	10
McMurry, M. P., et al. (1982). "Dietary cholesterol and the plasma lipids and lipoproteins in the Tarahumara Indians: a people habituated to a low cholesterol diet after weaning." Am J Clin Nutr 35(4): 741-744.	McMurry 1982	1	US	Intervention trial		1			U.S. Public Health Service; National Heart Lung and Blood Institute; National Institiute of Health	No 1980's	0	1	0	Y	1	0	0	Uncontrolled study of the effect of dietary chol (from eggs) on blood chol in individuals on a habitually low-chol diet.			0	1			0	1	3w	3	3	8	8										3	3	3	3	8	8	8	8
Quig D.W., Thye F.W., Ritchey S.J., Herbert W.G., Clevidence B.A., Reynolds L K., Smith M.C. (1983). "Effects of short-term aerobic conditioning and high cholesterol feeding on plasma total and lipoprotein cholesterol levels in sedentary young men." Am / Clin Nutr 38: 825-834.	Quig 1983	1	US	Intervention trial		1			Supported in part by a grant from the American Egg Board, Park Ridge, IL.	Yes 1980's	1	0	0	Y	1	0	1	Parallel comparison of 400mg/d vs 1400mg/d dietary chol, with or without aerobic exercise for effects on lipids.			1	0	1	0			4w	4	4	6	6		4	4	4	4	6	6	6	6
Nestel PJ, Billington T. Increased transport of intermediate density lipoprotein (IDL) with cholesterol loading. Metabolism. 1983;32:320-322.	Nestel 1983	1	Australia	Intervention trial		1			Supported in part by a grant from the National Health and Medical Research Council of Australia.	No 1980's	0	1	0	Y	1	0	0	Comparison of 200 mg/d vs 1700 mg/d of dietary chol for effects on lipids.			1	0			1	0	3-4w	3.5	3.5	8	8										3.5	3.5	3.5	3.5	8	8	8	8
Packard, C. J., et al. (1983). "Cholesterol feeding increases low density lipoprotein synthesis." J Clin Invest 72(1): 45-51.	Packard 1983	1	United Kingdom	Intervention trial		1			British Heart Foundation	No 1980's	0	1	0	Y	1	0	0	Uncontrolled test of the effect of 6 eggs/d on lipids.			0	1			0	1	4w	4	4	7	7										4	4	4	4	7	7	7	7
Flynn, M., Anderson A, Rutledge MS, Nolph GB, Krause G, and Ellersieck M: (1984). "Eggs, serum lipids, emotional stress and blood pressure in medical students." Arch Environ Health 39: 90.	Flynn 1984	1	US	Intervention trial		1			Support for this study was provided by the Clinical Research Center, University of Missouri School of Medicine, Dept of Family and Community Medicine; American Egg Board; and College of Home Economics	Yes 1980's	1	0	0	Y	1	0	1	Crossover comparison of 2 eggs vs no eggs for effects on lipids.			1	0	1	0			3m	12	12	25	25		12	12	12	12	25	25	25	25
Sacks, F. M., et al. (1984). "Ingestion of egg raises plasma low density lipoproteins in free-living subjects." Lancet 1(8378): 647-649.	Sacks 1984a	1	US	Intervention trial		1			National Research Service Award, American Heart Association	No 1980's	0	1	0	Y	1	0	0	Crossover comparison of egg vs egg substitute for effects on lipids.			1	0			1	0	3w	3	3	17	17										3	3	3	3	17	17	17	17
Oh SY, Monaco PA. Effect of dietary cholesterol and degree of fat unsaturation on plasma lipid levels, lipoprotein composition, and fecal steroid excretion in normal young adult men. Am J Clin Nutr. 1985;42:399-413.	Oh 1985a	1	US	Intervention trial		1			Supported by NIH Grant HL-2693	No 1980's	0	1	0	Y	1	0	0	Crossover comparison of diets varying in P/S ratio and dietary chol content, for effects on plasma lipids and fecal steroids. Although P/S ratio was adjusted in a crossover design, changes in dietary chol were in a parallel design.			1	0			1	0	6w	6	6	11	11										6	6	6	6	11	11	11	11
Beynen, A. C. and M. B. Katan (1985). "Effect of egg yolk feeding on the concentration and composition of serum lipoproteins in man." Atherosclerosis 54(2): 157-166.	Beynen 1985a	1	The Netherlands	Intervention trial		1			This work was supported by the Netherlands Heart Foundation, grant no. 31.013 and an established investigatorship to M.B.K.	No 1980's	0	1	0	Y	1	0	0	Uncontrolled feeding study using 6 egg yolks, done twice, a year apart.			0	1			0	1	10d	1.5	1.5	6	6										1.5	1.5	1.5	1.5	6	6	6	6
Beynen, A. C. and M. B. Katan (1985). "Reproducibility of the variations between humans in the response of serum cholesterol to cessation of egg consumption." Atherosclerosis 57(1): 19-31.	Beynen 1985c	1	Netherlands	Intervention trial		1			Supported by the Netherlands Heart Foundation, grants 26003 and 31013, and an estabhshed investigatorship to M.B.K.	No 1980's	0	1	0	Y	1	0	0	The 1st study, in 34 participants, was an uncontrolled study of the effect of egg cessation, done for 3w on 2 occasions 1y apart. The 2nd study, in 6 participants, used high- and low-chol diets for 4w each, followed by 4w with 1 egg/d. Goal was to assess stability of responses over time.			0	1			0	1	1st study: 3w egg cessation. 2nd study: 4w on high- and low-chol diets, followed by 1 egg/d for 4w.	4	4	40	40										4	4	4	4	40	40	40	40
Green, E. M., G. O. Perez, et al. (1985). "Effect of egg supplements on serum lipids in uremic patients." J Am Diet Assoc 85(3): 355-357.	Green 1985	1	US	Intervention trial		1			unknown funding	Unknown 1980's	0	1	1	Y	1	0	0	Crossover comparison of 3 eggs vs no eggs for effects on lipids.			1	0			1	0	4w	4	4	6	6										4	4	4	4	6	6	6	6
Oh, S. Y. and L. T. Miller (1985). "Effect of dietary egg on variability of plasma cholesterol levels and lipoprotein cholesterol." Am J Clin Nutr 42(3): 421-431.	Oh 1985b	1	US	Intervention trial		1			The American Egg Board and NIH	Yes 1980's	1	0	0	Y	1	0	1	Uncontrolled test of 3 eggs/d for 28d, followed by tests in "hyper-" and "hypo-responders."			0	1	0	1			28d	4	4	21	21		4	4	4	4	21	21	21	21
Flynn, M. A., G. B. Nolph, et al. (1986) Serum lipids and eggs. J Am Diet Assoc 1541-1548	Flynn 1986	1	US	Intervention trial		1			Funding unknown	Unknown 1980's	0	1	1	Y	1	0	0	Crossover comparison of 3 eggs/d vs no eggs for effects on lipids.			1	0			1	0	12w and 10w	11	11	70	70										11	11	11	11	70	70	70	70
Katan, M. B., et al. (1986). "Existence of consistent hypo- and hyperresponders to dietary cholesterol in man." Am J Epidemiol 123(2): 221-234.	Katan 1986	1	The Netherlands	Intervention trial		1			Netherlands Heart Foundation	No 1980's	0	1	0	Y	1	0	0	Feeding study using low-cholesterol (121 mg/d) and high-cholesterol (625 mg/d) diets to identify hyper- and hyporesponders, followed by additional tests on those subgroups.			1	0			1	0	13d	2	2	94	94										2	2	2	2	94	94	94	94
Kaufman, T., et al. (1986). "Early enteral nutrition for mass burn injury: the revised egg-rich diet." Burns Incl Therm Inj 12(4): 260-263.	Kaufman 1986	1	Israel	Intervention trial		1			unknown funding	Unknown 1980's	0	1	1	N	0	1	0	Uncontrolled study of the use of eggs in burn victims.			0	1			0	1	40d	6	6	12	12										6	6	6	6	12	12	12	12
Lacombe, C. R., et al. (1986). "Effects of a low-energy diet associated with egg supplementation on plasma cholesterol and lipoprotein levels in normal subjects: results of a cross-over study." Br J Nutr 56(3): 561-575.	Lacombe 1986	1	France	Intervention trial		1			unknown funding	Unknown 1980's	0	1	1	Y	1	0	0	Crossover comparison of usual diet + 4 egg yolks vs low-energy diet + 4 egg yolks, both also compared to baseline.			1	0			1	0	4w	4	4	17	17										4	4	4	4	17	17	17	17
Nestel, P. J. (1986). "Fish oil attenuates the cholesterol induced rise in lipoprotein cholesterol." Am J Clin Nutr 43(5): 752-757.	Nestel 1986	1	Australia	Intervention trial		1			Baker Medical Research Institute	No 1980's	0	1	0	Y	1	0	0	Uncontrolled study of fish oil with and without eggs for effects on lipids.			1	0			1	0	3w	3	3	6	6										3	3	3	3	6	6	6	6
McNamara DJ, Kolb R., Parker TS, et al. (1987). "Heterogeneity of cholesterol homeostasis in man. Response to changes in dietary fat quality and cholesterol quantity." J Clin Invest; 79:1729-1739.	McNamara 1987	1	US	Intervention trial		1			This work was supported in part by U. S. Public Health Service grants (HL24190 and HL28727 from the National, Heart, Lung and Blood Institute, FR-00102 from the General Clinical Research Center Branch, Division of Research Resources, and CA29502 from the National Cancer Institute), and by grants from the American Egg Board, the National Dairy Council, the Herman Goldman Foundation, and the Jean a…	Yes 1980's	1	0	0	Y	1	0	1	Uncontrolled test of the addition of 3 eggs/d for 6w on diets that were high in either PUFA or SFA, followed by crossover trial in 25 participants, for effects on lipids.			1	0	1	0			6w	6	6	75	75		6	6	6	6	75	75	75	75
Edington, J., M. Geekie, et al. (1987) Effect of dietary cholesterol on plasma cholesterol concentration in subjects following reduced fat, high fibre diet. British medical journal (Clinical research ed.) 333-336	Edington 1987	1	England	Intervention trial		1			funding unknown	Unknown 1980's	0	1	1	Y	1	0	0	Crossover comparison of 2 eggs/w vs 7 eggs/ w for effects on lipids.			1	0			1	0	8w	8	8	168	168										8	8	8	8	168	168	168	168
Zanni, E. E., et al. (1987). "Effect of egg cholesterol and dietary fats on plasma lipids, lipoproteins, and apoproteins of normal women consuming natural diets." J Lipid Res 28(5): 518-527.	Zanni 1987	1	US	Intervention trial		1			American Egg Board and grants from the National Institutes of Health and the Rhode Island Affiliate of the American Heart Association	Yes 1980's	1	0	0	Y	1	0	1	Comparison of 4 diets for their lipid effects: (1) corn oil, (2) corn oil + egg, (3) lard, and (4) lard + egg). Not clear if it was a crossover design.			1	0	1	0			15d	2	2	9	9		2	2	2	2	9	9	9	9
Miettinen TA, Gylling H, Vanhanen H. Serum cholesterol response to dietary cholesterol and apoprotein E phenotype. Lancet. 1988;2:1261.	Miettinen 1988	1	Finland	Intervention trial		1			Unknown funding	Unknown 1980's	0	1	1	Y	1	0	0	Comparison of 2 diets: (1) low-fat/low-chol, (2) low-fat/high-chol (from egg yolks) in participants with known APOE genetic status. Not clear if it was a crossover design.			1	0			1	0	6w	6	6	16	16										6	6	6	6	16	16	16	16
Bowman MP, van Doren J, Taper JT, Thye FW, Ritchey SJ. (1988). "Effect of dietary fat and cholesterol in plasma lipids and lipoprotein fractions in normolipidemic men. ." J Nutr 118:: 555-560	Bowman 1988	1	US	Intervention trial		1			This research was supported in part by a giant from the American Egg Board, Park Ridge, IL.	Yes 1980's	1	0	0	Y	1	0	1	Parallel comparison of 4 diets for their effects on lipids: (1) low-fat/low-chol, (2) low-fat/usual-chol, (3) usual-fat/low-chol, and (4) usual-fat/usual-chol.			1	0	1	0			5w	5	5	9	9		5	5	5	5	9	9	9	9
Edington, J. D., Geekie, M., Carter, R., Benfield, L., Ball, M. & Mann, J. (1989). "Serum lipid response to dietary cholesterol in subjects fed a low-fat, high-fiber diet." Am. J. Clin. Nutr. 50: 58-62.	Edington 1989	1	UK	Intervention trial		1			Supported by a grant from the Simon Broome Heart Research Trust.	No 1980's	0	1	0	Y	1	0	0	Comparison of low- and high-egg intake for effects on lipids in context of a low-fat, high-fiber diet.			1	0			1	0	4w	4	4	43	43										4	4	4	4	43	43	43	43
Kestin, M., et al. (1989) Effect of dietary cholesterol in normolipidemic subjects is not modified by nature and amount of dietary fat. American journal of clinical nutrition 50, 528-532	Kestin 1989	1	Australia	Intervention trial		1			National Heart Foundation of Australia and The Poultry Research Council	Yes 1980's	1	0	0	Y	1	0	1	Crossover comparison of drink with ~2 yolks vs no yolks.			1	0	1	0			4w	4	4	25	25		4	4	4	4	25	25	25	25
Totals 1980s		47	0		9	37	1	0		Totals 1980s	13	34	10	Totals 1980s	44	3	13				24	13	7	3	17	10	0								4.9	4			21.8	20.5			4.42593	4			26.037	14
1990s
Hopkins PN. (1992). "Effect of dietary cholesterol on serum cholesterol: a meta-analysis and review." Am J Clin Nutr 55: 1060–1070.	Hopkins 1992	1	US	Review, Meta-analysis				1	Supported in part by grant HL-2l088-12 from the National Heart, Lung, and Blood Institute, Bethesda, MD.	No 1990's	0	1	0	Y	1	0
Howell WH, McNamara DJ, Tosca MA, Smith BT, Gaines JA. (1997). "Plasma lipid and lipoprotein responses to dietary fat and cholesterol: a meta-analysis." Am J Clin Nutr 65: 1747e1764.	Howell 1997	1	US	Review, Meta-analysis				1	Supported by a grant-in-aid from the American Egg Board administered through the Egg Nutrition Center and by funds from The University of Arizona Agricultural Experiment Station.	Yes 1990's	1	0	0	Y	1	0	1
Clarke R, Frost C, Collins R, Appleby P, Peto R. Dietary lipids and blood cholesterol: quantitative meta-analysis of metabolic ward studies. BMJ. 1997;314:112-7.	Clarke 1997	1	UK	Review, Meta-analysis				1	British Heart Foundation and Medical Research Council	No 1990's	0	1	0	Y	1	0	0
Kern F. (1991). "Normal plasma cholesterol in an 88-year-old man who eats 25 eggs a day. Mechanisms of adaptation." N Engl J Med 324: 896.	Kern 1991	1	US	Case Report			1		Supported by grants from the National Institutes of Health	No 1990's	0	1	0	Y	1	0	0	Case report
Johnson C, Greenland P. (1990). "Effects of exercise, dietary cholesterol, and dietary fat on blood lipids." Arch Intern Med 150: 137–141.	Johnson 1990	1	US	Intervention trial		1			This study was supported by grants from the Charles A. Dana Foundation, New York, NY, the Preventive Cardiology Academic Award from the National Heart, Lung, and Blood Institute, K-07-HL-00982, and a Clinical Research Center Grant from the National Institutes of Health (Bethesda, Md), No. RR00044.	No 1990's	0	1	0	Y	1	0	0	Crossover comparison of effects of 200mg-chol diet vs 600mg-chol diet on blood lipids.	Crossover	Y	1	0			1	0	4w	4	4	10	10										4	4	4	4	10	10	10	10
Clifton, P. M., M. Kestin, et al. (1990) Relationship between sensitivity to dietary fat and dietary cholesterol. Arteriosclerosis 394-401	Clifton 1990	1	Australia	Intervention trial		1			This work was partly supported by the National Heart Foundation of Australian and the Egg Industry Research Council of Australia	Yes 1990's	1	0	0	Y	1	0	1	Crossover comparison of 2 drinks, one with ~700 mg cholesterol and the other without, for effects on lipids.	Crossover	Y	1	0	1	0			4w	4	4	45	45		4	4	4	4	45	45	45	45
Boerwinkle E, Brown S, Rohrbach K, Gotto A, Patsch W. (1991). "Role of apolipoprotein E and B gene variation in determining response of lipid, lipoprotein, and apolipoprotein levels to increased dietary cholesterol." Am J Hum Genet. 49: 1145–1154.	Boerwinkle 1991	1	US	Intervention trial		1			This work was supported by NIH grants HL 41199, HL 27341, and HL 40613.	No 1990's	0	1	0	Y	1	0	0	All participants followed a 3w diet with 300mg of cholesterol/d, followed by a 3w diet with 1,700 mg of cholesterol/d (6 eggs/d). Effects on lipids were assessed.	Participants were their own controls.	N	1	0			1	0	3w x 2 (all Ss followed both diets in sequence)	3	3	71	71										3	3	3	3	71	71	71	71
Eriksson M, A. B., Henriksson P, Ericsson S, Vitols S, Berglund L. (1991). "Metabolism of lipoprotein remnants in humans." Arterioscler Thromb. 11:827–837.	Ericksson 1991	1	Sweden	Intervention trial		1			Supported by the Swedish Medical Research Council (project No. 03X-07137), the King Gustaf V and Queen Victoria Foundation, the Karolinska Institute, and the Tore Nilsson Foundation	No 1990's	0	1	0	N	0	1	0	Duodenal infusion of fat/chol mixture, with blood sampling over 24h.	N	N	0	1			0	1	6h, with a 24h follow-up	0	0	32	32										0	0	0	0	32	32	32	32
Brown SA, Morrisett J, Patsch JR, Reeves R, Gotto AM Jr, Patsch W. Influence of short term dietary cholesterol and fat on human plasma Lp[a] and LDL levels. J Lipid Res. 1991;32:1281-1289.	Brown 1991	1	US	Intervention trial		1			This work was supported by NIH grant HL 41199-03 and SCOR contract HL 27341.	No 1990's	0	1	0	Y	1	0	0	Study 1: 81 participants had 6 eggs/d; no control. Study 2: 14 participants had 4 sequential diets: (1) high-SFA/low-chol, (2) high-SFA + 6 eggs/d, (3) high-PUFA/low-chol, and (4) high-PUFA + 6 eggs/d.	Participants were their own controls.	N	1	0			1	0	Study 1: 3w on 6-egg diet. Study 2: Each diet lasted 3w.	3	3	95	95										3	3	3	3	95	95	95	95
Morgan JM, Garwin JL, Hockstein RL, et al. Effect of eggs from kelp-fed chickens on serum lipid levels. Clin Research. 1991;39:448a.	Morgan 1991	1	US	Intervention trial		1			Unknown (abstract only), but investigators full articles acknowledge industry funding.	Unknown 1990's	0	1	1	Y	1	0	0	Parallel comparison of 3 diets for effects on lipids: reduced fat (9% sat fat), reduced fat + 1 kelp-fed chicken egg/d, reduced fat + 2 PUFA/vitamin-enriched eggs/d.	Y	Y	1	0			1	0	12w	12	12	70	70										12	12	12	12	70	70	70	70
Arora, R. C., N. Agarwal, et al. (1991) A comparative study of three different test diets in change in plasma total cholesterol in young healthy individuals. Mater Med Pol 296-298	Arora 1991a	1	India	Intervention trial		1			funding unknown	Unknown 1990's	0	1	1	Y	1	0	0	Controlled evaluation of 3 meals: butter and milk, egg, or crystalline cholesterol dissolved in milk.	Y	Y	1	0			1	0	3 hours	0	0	8	8										0	0	0	0	8	8	8	8
Arora, R. C., N. Agarwal, et al. (1991). "A study of short term lipoprotein changes induced by single high cholesterol diet in healthy and diseases human volunteers." Mater Med Pol 23(4): 299-301.	Arora 1991b	1	India	Intervention trial		1			funding unknown	Unknown 1990's	0	1	1	Y	1	0	0	Uncontrolled test of single meal w 750 mg chol from eggs.	N	N	0	1			0	1	3 hours	0	0	39	39										0	0	0	0	39	39	39	39
Flynn, M. A., G. B. Nolph, et al. (1991) Effects of cholesterol and fat modification of self-selected diets on serum lipids and their specific fatty acids in normocholesterolemic and hypercholesterolemic humans. J Am Coll Nutr 93-106	Flynn 1991	1	US	Intervention trial		1			Supported in part by the School of Medicine, College of Agriculture, University of Missouri-Columbia and by the Wallace Genetic Foundation.	No 1990's	0	1	0	Y	1	0	0	Crossover comparison of 2 eggs + margarine vs 2 eggs + butter. Effect of eggs was not isolated. The control is adequate for effect of margarine vs butter, but not for effect of eggs.	Crossover	Not specified	1	0			1	0	24w	24	24	71	71										24	24	24	24	71	71	71	71
Oh, S. Y., et al. (1991) Eggs enriched in omega-3 fatty acids and alterations in lipid concentrations in plasma and lipoproteins and in blood pressure. American journal of clinical nutrition 54, 689-695	Oh 1991	1	US	Intervention trial		1			Division of Food and Nutrition, University of Utah; Department of Dietetics and Nutrition University of Kansas Medical Center; Departments of Food Science and Nutrition and Animal, Dairy and Veterinary Sciences.	No 1990's	0	1	0	Y	1	0	0	Crossover comparison of 4 eggs/d vs 4 n3-enriched eggs/d for effects on lipids and BP. Note crossover is appropriate for comparing the 2 types of eggs, but not for comparing against no eggs.	Crossover	Y	1	0			1	0	4w	4	4	11	11										4	4	4	4	11	11	11	11
Clifton PM, Nestel PJ. (1992). "Influence of gender, body mass index, and age on response of plasma lipids to dietary fat plus cholesterol." Arterioscler Thromb. 12: 955–962.	Clifton 1992	1	Australia	Intervention trial		1			Supported in part by the Egg Industry Research Council of Australia.	Yes 1990's	1	0	0	1	1	0	1	Crossover comparison of 2 drinks, one containing SFA and 650mg chol, the other free of fat and chol.	Crossover	Y	1	0	1	0			3w	3	3	51	51		3	3	3	3	51	51	51	51
Gylling H, Miettien TA. Cholesterol absorption and synthesis related to low density lipoprotein metabolism during varying cholesterol intake in men with different apoE phenotypes. J Lipid Res. 1992;33:1361-1371.	Gylling 1992	1	Finland	Intervention trial		1			Supported in part by a grant from Juho Vainio Foundation	No 1990's	0	1	0	Y	1	0	0	Uncontrolled test of low-chol diet followed by high-chol diet for effects of chol absorption on chol metabolism.	N	N	0	1			0	1	6w low-chol, 5w high-chol	5	5	29	29										5	5	5	5	29	29	29	29
Morgan JM, Garwin JL, Stowell RL, et al. Divergent effects of dietary fat and egg cholesterol on serum lipid levels. Am J Clin Nutr. 1992;55 (suppl 3):abstract #90.	Morgan 1992	1	US	Intervention trial		1			Unknown (abstract only), but investigators' full articles acknowledge industry funding.	Unknown 1990's	0	1	1	Y	1	0	0	Parallel comparison of low-fat diet alone, diet + 1 egg, and diet + 2 eggs for effects on lipids. Study done at 2 sites, one with 7% SFA and the other with 10% SFA.	Y	Y	1	0			1	0	4w	4	4	47	47										4	4	4	4	47	47	47	47
Ferrier LK, C. L., Leeson 5, et al. (1992)." Changes in serum lipids and platelet fatty acid composition following consumption of eggs enriched in alpha-linolenic acid (LnA).” Food Res Int 25:263-268.	Ferrier 1992	1	Canada	Intervention trial		1			The authors appreciate the financial support of Maple Lynn Foods, the Ontario Egg Producers' Marketing Board, and the Ontario Ministry of Agriculture and Food.	Yes 1990's	1	0	0	Y	1	0	1	Uncontrolled comparison of control eggs and N3-enriched eggs for effects on lipids and platelet fatty acids.	N	N	0	1	0	1			2w	2	2	5	5		2	2	2	2	5	5	5	5
Garber, D. W., Y. Henkin, et al. (1992) Plasma lipoproteins in hyperlipidemic subjects eating iodine-enriched eggs. J Am Coll Nutr 294-303	Garber 1992	1	US	Intervention trial		1			This study was supported by a grant from C.R. Eggs, Inc., King of Prussia, PA, and by the General Clinical Research Center of UAB through NIH grant #RR00032-DivisioN of Research Resources.	Yes 1990's	1	0	0	Y	1	0	1	Parallel comparison of low-fat diet alone vs diet + 1 iodine-enriched egg/d for effects on lipids.	Y	Y	1	0	1	0			3w on diet alone, then 9w on diet alone or diet + egg	9	9	50	50		9	9	9	9	50	50	50	50
Garwin, J. L., J. M. Morgan, et al. (1992) Modified eggs are compatible with a diet that reduces serum cholesterol concentrations in humans. Journal of nutrition 2153-2160	Garwin 1992	1	US	Intervention trial		1			Funded by a grant from C. R. Eggs, Inc., King of Prussia, PA, 19406.	Yes 1990's	1	0	0	Y	1	0	1	Parallel comparison of a reduced-fat diet vs a reduced-fat diet + 12 eggs/w for effects on lipids.	Y	Y	1	0	1	0			6w	6	6	48	48		6	6	6	6	48	48	48	48
Lehtimaki, T., et al. (1992). "Cholesterol-rich diet induced changes in plasma lipids in relation to apolipoprotein E phenotype in healthy students." Ann Med 24(1): 61-66.	Lehtimaki 1992	1	Finland	Intervention trial		1			Finnish Foundation for Cardiovascular Research; Sigrid Juselius Foundation; and Finnish Cultural Foundation	No 1990's	0	1	0	Y	1	0	0	Nonrandomized crossover comparison of no eggs vs 3 eggs/d for effects on lipids.	Crossover	N	1	0			1	0	3w	3	3	36	36										3	3	3	3	36	36	36	36
Vorster, H. H., et al. (1992). "Egg intake does not change plasma lipoprotein and coagulation profiles." Am J Clin Nutr 55(2): 400-410.	Vorster 1992	1	South Africa	Intervention trial		1			SA Medical Research Council and South African Egg Board	Yes 1990's	1	0	0	Y	1	0	1	Parallel comparison of 3 eggs/w, 7 eggs/w, and 14 eggs/w for effects on lipids.	Y	Y	1	0	1	0			5m	21	21	44	44		21	21	21	21	44	44	44	44
Martin LJ, C. P., Nancoo D, Wood N, Zhang ZJ, Maguire G, Quinet E, Tall AR, Marcel YL, McPherson R. (1993). "Cholesteryl ester transfer protein and high density lipoprotein responses to cholesterol feeding in men: relationship to apolipoprotein E genotype." J Lipid Res. 34:437– 446.	Martin 1993	1	Canada	Intervention trial		1			Unknown funding.	Unknown 1990's	0	1	1	Y	1	0	0	Crossover comparison of low- and high-chol diets for effects on lipids.	Crossover	Y	1	0			1	0	35d	5	5	30	30										5	5	5	5	30	30	30	30
Glatz JF, Turner PR, Katan MB, Stalenhoef AF, Lewis B. Hypo- and hyperresponse of serum cholesterol level and low density lipoprotein production and degradation of dietary cholesterol in man. Ann N Y Acad Sci. 1993;676:163-179	Glatz 1993	1	The Netherlands	Intervention trial		1			The Netherlands Heart Foundation	No 1990's	0	1	0	Y	1	0	0	Nonrandomized crossover comparison of low- and high-chol diets to assess stability of responses to dietary chol over time. Participants had also been in prior studies: Katan 1986, 1987, and 1988.	Crossover	N	1	0			1	0	14-15d	2	2	23	23										2	2	2	2	23	23	23	23
Jiang, Z. and J. S. Sim (1993) Consumption of n-3 polyunsaturated fatty acid-enriched eggs and changes in plasma lipids of human subjects. Nutrition 9, 513-518	Jiang 1993	1	Canada	Intervention trial		1			Ontario Egg Producers' Marketing Board and the Flax Council of Canada	Yes 1990's	1	0	0	Y	1	0	1	Parallel comparison of 2 regular eggs vs 2 n3-enriched eggs for effects on lipids.	Y	Y	1	0	1	0			18d	2.5	2.5	23	23		2.5	2.5	2.5	2.5	23	23	23	23
Morgan, J. M., et al. (1993) Effect of dietary (egg) cholesterol on serum cholesterol in free-living adults. J. Appl. Nutr. 45, 74-84	Morgan 1993	1	US	Intervention trial		1			Eggland's Best	Yes 1990's	1	0	0	Y	1	0	1	Parallel comparison of a low-fat diet alone vs a low-fat diet + 12 eggs/w, for effects on serum cholesterol.	Y	Y	1	0	1	0			6w	6	6	47	47		6	6	6	6	47	47	47	47
Vuoristo, M. and T.A. Miettinen. (1994). "Absorption, metabolism, and serum concentrations of cholesterol in vegetarians: effects of cholesterol feeding." Am. J. Clinc. Nutr. 59(6): 1325-1331.	Vuoristo 1994	1	Finland	Intervention trial		1			Supported by grants from the University of Helsinki and the Juho Vainio Foundation.	No 1990's	0	1	0	Y	1	0	0	Cholesterol absorption and synthesis were studied in vegetarian and nonvegetarian participants. Then an uncontrolled egg-feeding study was done on vegetarians.	N	N	0	1			0	1	Egg feeding study included 3 eggs/d for 2m.	8	8	5	5										8	8	8	8	5	5	5	5
Dubois C, Armand M, Mekki N, Portugal H, Pauli A-M, Bernard P-M, Lafont H, Lairon D: Effects of increasing amounts of dietary cholesterol on postprandial lipemia and lipoproteins in human subjects. J Lipid Res. 1994;35:1993-2007.	Dubois 1994	1	France	Intervention trial		1			This work was partially supported by grants from the Ministries of Research and Agriculture (Aliment 2000, No. 92-G-0553) and Groupe BSN (Paris)	No 1990's	0	1	0	Y	1	0	0	Crossover comparison of 5 test meals for their effects on postprandial lipid responses: one with no fat/chol, and the others with 45g-fat with 0, 140, 280, or 710 mg chol.	Crossover	Y	1	0			1	0	7h	0	0	10	10										0	0	0	0	10	10	10	10
Ginsberg, H. N., W. Karmally, et al. (1994) A dose-response study of the effects of dietary cholesterol on fasting and postprandial lipid and lipoprotein metabolism in healthy young men. Arteriosclerosis and thrombosis 576-586	Ginsberg 1994	1	US	Intervention trial		1			This study was supported by grants HL-36000, HL-21006, and RR-645 from the National Institutes of Health and a grant from the American Egg Board. Support was also provided by Fleischmann Inc.	Yes 1990's	1	0	0	Y	1	0	1	Crossover comparison of 0, 1, 2, and 4 eggs/d for 8w for effects on lipids, plus postprandial tests following high-fat feeding.	Crossover	Y	1	0	1	0			8w diet exposures, plus 4h and 8h postprandial tests.	8	8	20	20		8	8	8	8	20	20	20	20
Lichtenstein, A. H., et al. (1994). "Hypercholesterolemic effect of dietary cholesterol in diets enriched in polyunsaturated and saturated fat. Dietary cholesterol, fat saturation, and plasma lipids." Arterioscler Thromb 14(1): 168-175.	Lichtenstein 1994	1	US	Intervention trial		1			US Department of Agriculture, National Institute of Health, Uncle Bens Inc. (rice company)	No 1990's	0	1	0	Y	1	0	0	Crossover comparison of 5 diets for their effects on lipids: (1) baseline (2) corn oil (3) corn oil + chol, (4) beef tallow, and (5) beef tallow + chol.	Crossover	N	1	0			1	0	32d	4.5	4.5	14	14										4.5	4.5	4.5	4.5	14	14	14	14
McCombs, R. J., et al. (1994). "Attenuated hypercholesterolemic response to a high-cholesterol diet in subjects heterozygous for the apolipoprotein A-IV-2 allele." N Engl J Med 331(11): 706-710.	McCombs 1994	1	US	Intervention trial		1			General Clinical Research Center of the Bowman Gray School of Medicine; The American Heart Association; The National Heart, Lung, and Blood Institute; and The Bowman Gray School of Medicine	No 1990's	0	1	0	Y	1	0	0	Parallel comparison of lipid response to 4 eggs/d among participants with the apo A-IV-1/2 (heterozygous) genotype vs the A-IV-1/1 (homozygous) genotype.	N (There were 2 genetic groups, but no control for egg consumption.)	N	1	0			1	0	3w	3	3	23	23										3	3	3	3	23	23	23	23
Schnohr, P., et al. (1994). "Egg consumption and high-density-lipoprotein cholesterol." J Intern Med 235(3): 249-251.	Schnohr 1994	1	Denmark	Intervention trial		1			unknown funding	Unknown 1990's	0	1	1	Y	1	0	0	Crossover comparison of 2 eggs/d vs usual diet for effect on HDL.	Crossover	N	1	0			1	0	6w	6	6	24	24										6	6	6	6	24	24	24	24
Duane WC. Effects of lovastatin and dietary cholesterol on sterol homeostasis in healthy human subjects. J Clin Invest. 1993 Aug;92(2):911-8.	Duane 1993	1	US	Intervention trial		1			Financial support was provided by grants from the Department of Veterans Affairs and the National Institutes of Health (R01-DK42433).	No 1990's	0	1	0	Y	1	0	0	Crossover comparison of 4 conditions: (1) low-chol diet, (2) high-chol diet, (3) low-chol diet + lovastatin, (4) high-chol diet + lovastatin on sterol homeostasis.	Crossover	Y	1	0			1	0	6-7w	6.5	6.5	12	12										6.5	6.5	6.5	6.5	12	12	12	12
Ferrier, L. K., L. J. Caston, et al. (1995) alpha-Linolenic acid- and docosahexaenoic acid-enriched eggs from hens fed flaxseed: influence on blood lipids and platelet phospholipid fatty acids in humans. American journal of clinical nutrition 81-86	Ferrier 1995	1	Canada	Intervention trial		1			Supported by the Ontario Ministry of Agriculture and Food and the Heart and Stroke Foundation of Ontario, Canada.	No 1990's	0	1	0	Y	1	0	0	Crossover comparison of 3 conditions: 4 control eggs/d, 4 10% flaxseed-modied eggs/d, and 4 20% flaxseed-modified eggs/d for effects on lipids.	Crossover	U	1	0			1	0	2w	2	2	28	28										2	2	2	2	28	28	28	28
Ginsberg, H. N., W. Karmally, et al. (1995) Increases in dietary cholesterol are associated with modest increases in both LDL and HDL cholesterol in healthy young women. Arterioscler Thromb Vasc Biol 169-178	Ginsberg 1995	1	US	Intervention trial		1			This work was supported by grants HL-36000, HL-21006, and RR-645 from the National Institutes of Health and a grant from the American Egg Board. Support was also provided by Fleischmann Inc.	Yes 1990's	1	0	0	Y	1	0	1	Crossover comparison of 0, 1, 2, and 4 eggs/d for 8w for effects on lipids in women, plus postprandial tests following high-fat feeding.	Crossover	Y	1	0	1	0			8w diet exposures, plus 4h and 8h postprandial tests.	8	8	13	13		8	8	8	8	13	13	13	13
P.M. Clifton, P.J. Nestel, Effect of dietary cholesterol on postprandial lipoproteins in three phenotypic groups, Am. J. Clin. Nutr. 64 (1996) 361-367.	Clifteon 1996	1	Australia	Intervention trial		1			Supported in part by the Egg Industry Council of Australia.	Yes 1990's	1	0	0	Y	1	0	1	Crossover postprandial trial of "fat meal" and a "fat plus cholesterol meal" in 3 groups of participants: normal, high-chol, and high-TG, for effects on lipids.	Crossover	Y	1	0	1	0			7h	0	0	21	21		0	0	0	0	21	21	21	21
Levy Y, Maor I, Presser D, Aviram M. Consumption of eggs with meals increases the susceptibility of human plasma and low-density lipoprotein to lipid peroxidation. Ann Nutr Metab. 1996;40:243–51.	Levy 1996	1	Israel	Intervention trial		1			Funding unknown	Unknown 1990's	0	1	1	Y	0	1	0	Uncontrolled test of 2 eggs/d on lipid peroxidation.	N	N	0	1			0	1	3w	3	3	17	17										3	3	3	3	17	17	17	17
De Oliveira e Silva, E. R., C. E. Seidman, et al. (1996). "Effects of shrimp consumption on plasma lipoproteins." Am J Clin Nutr 64(5): 712-717.	De Oliveira e Silva 1996	1	US	Intervention trial		1			Supported in part by “Gene-diet effects on lipoprotein metabolism” (HL32435) and a General Clinical Research Center grant (MOl -RROO1O2) from the National Center for Research Resources at the National Institutes of Health.	No 1990's	0	1	0	Y	1	0	0	Crossover comparison of baseline diet, shrimp, and egg for effects on plasma lipids.	Crossover	Y	1	0			1	0	3w	3	3	18	18										3	3	3	3	18	18	18	18
Knopp, R. H., et al. (1997) A double-blind, randomized, controlled trial of the effects of two eggs per day in moderately hypercholesterolemic and combined hyperlipidemic subjects taught the NCEP step I diet. J Am Coll Nutr 16, 551-561	Knopp 1997	1	US	Intervention trial		1			National Institutes of Health; Egg Nutrition Center; Robert B. McMilleu Family Trust Donation	Yes 1990's	1	0	0	Y	1	0	1	Parallel comparison of NCEP Step 1 diet + 2 eggs/d or NCEP Step 1 diet + egg substitute for effects on lipids in individuals with hypercholesterolemia vs combined hyperlipidemia.	Y	Y	1	0	1	0			12w	12	12	75	75		12	12	12	12	75	75	75	75
Sutherland, W. H., et al. (1997) The effect of increased egg consumption on plasma cholesteryl ester transfer activity in healthy subjects. Eur J Clin Nutr 51, 172-176	Sutherland 1997	1	New Zealand	Intervention trial		1			Nye Special Lipid Fund.	No 1990's	0	1	0	Y	1	0	0	"Parallel" comparison of 1 egg vs usual diet for effects on plasma cholesteryl ester transfer activity. The control group consisted of former participants from another study, not quite coincident in time with the experimental group.	Y	N	1	0			1	0	12d	2	2	26	26										2	2	2	2	26	26	26	26
Romano G, Tilly-Kiesi MK., Patti L, Taskinen MR, Pacioni D, Cassader M, et al. (1998). "Effects of dietary cholesterol on plasma lipoproteins and their subclasses in IDDM patients." Diabetologia 41:193–200.	Romano 1998	1	Italy	Intervention trial		1			This work was supported in part by the Italian National Research Council grant n. 91.00 226. PF41-target projects "Prevention and control of Disease factors", subproject "Nutrition."	No 1990's	0	1	0	Y	1	0	0	Crossover comparison of egg-supplemented diet (800mg chol/d) vs placebo, for lipid responses for individuals with type 1 DM and those without DM.	Crossover	Y	1	0			1	0	3w	3	3	21	21										3	3	3	3	21	21	21	21
Sarkkinen E, Korhonen M, Erkkila A, et al. (1998). "Effect of apolipoprotein E polymorphism on serum lipid response to the separate modification of dietary fat and dietary cholesterol." Am J Clin Nutr 68(6): 1215-1222.	Sarkkinen 1998	1	Finland	Intervention trial		1			Supported by the Finnish Academy, Research Council for Health.	No 1990's	0	1	0	Y	1	0	0	Compared 3 different APOE genotypes for lipid responses to 3 diets (baseline, NCEP, NCEP + chol) presented in fixed order.	Participants were their own controls.	N	0	1			0	1	8w on NCEP + chol	8	8	45	45										8	8	8	8	45	45	45	45
Blanco-Molina A., G. Castro, D. Martin-Escalante, D. Bravo, J. Lopez-Miranda, P. Castro, F. Lopez-Segura, J.C. Fruchart, J.M. Ordovas, F. Perez-Jimenez, Effects of different dietary cholesterol concentrations on lipoprotein plasma concentrations and on cholesterol efflux from Fu5AH cells, Am. J. Clin. Nutr. 68 (1998) 1028-1033.	Blanco-Molina 1998	1	Spain	Intervention trial		1			Supported by the Spanish Ministry of Health (FIS 92/0182 to F P-J), Consejería de Agricultura y Pesca de la Junta de Andalucía, and Fundación Cultural Hospital Reina Sofía (to P Castro).	No 1990's	0	1	0	Y	1	0	0	Crossover comparison of high-MUFA diet vs high-MUFA diet + 2 eggs/d. Also used NCEP diets before and after the crossover. Goal was to assess effects of dietary chol on plasma lipids, and also on chol efflux from Fu5AH cells.	Crossover	Y	1	0			1	0	24d for each diet period.	3.5	3.5	15	15										3.5	3.5	3.5	3.5	15	15	15	15
Farrell, D. J. (1998) Enrichment of hen eggs with n-3 long-chain fatty acids and evaluation of enriched eggs in humans. Am J Clin Nutr 538-544	Farrell 1998	1	Australia	Intervention trial		1			Supported by the Egg Industry Research and Development Council and the University of New England.	Yes 1990's	1	0	N	N	0	1	0	Uncontrolled test of 3 eggs/d for 2w for effects on lipids, weight, and BP. This followed a parallel comparison of the effects of eggs varying in fatty acid composition.	N	Not specified	0	1	0	1			2w (note only the final 2w assessed the effect of increased egg intake on lipids)	2	2	56	56		2	2	2	2	56	56	56	56
Karge, I. W., et al. (1999) Pilot study on the effect of hyperimmune egg protein on elevated cholesterol levels and cardiovascular risk factors. J Med Food 2, 51-63	Karge 1999	1	US	Intervention trial		1			DCV BioNutrition Inc.(company that produces dietary and nutritional supplements)	Yes 1990's	1	0	0	Y	1	0	1	Parallel comparison of 3 conditions: usual diet, eggless drink, or drink with hyperimmune egg powder (containing 85 mg chol) for effects on lipids.	Y	Y	1	0	1	0			26w	26	26	15	15		26	26	26	26	15	15	15	15
Totals 1990s		45	0		0	41	1	3		Totals 1990s	15	30	7	Totals 1990s	42	3	14				33	8	12	2	21	6									7.82143	6			36.6429	44.5			4.5	3			30.7407	24
2000s
Weggemans, R. M., et al. (2001). "Dietary cholesterol from eggs increases the ratio of total cholesterol to high-density lipoprotein cholesterol in humans: a meta-analysis." Am J Clin Nutr 73(5): 885-891.	Weggemans 2001	1	The Netherlands	Review, Meta-analysis				1	Netherlands Heart Foundation	No 2000's	0	1	0	Y	1	0	0
Song, W. O. and J. M. Kerver (2000). "Nutritional contribution of eggs to American diets." J Am Coll Nutr 19(5 Suppl): 556S-562S.	Song 2000	1	US	Observational	1				Egg Nutrition Center	Yes 2000's	1	0	0	Y	1	0	1
Nakamura, Y., et al. (2004). "Egg consumption, serum cholesterol, and cause-specific and all-cause mortality: the National Integrated Project for Prospective Observation of Non-communicable Disease and Its Trends in the Aged, 1980 (NIPPON DATA80)." Am J Clin Nutr 80(1): 58-63.	Nakamura 2004	1	Japan	Observational	1				Japanese Association for Cerebro-cardiovascular Disease Control; Ministry of Health, Labour, and Welfare; Health and Labour Sciences Research Grant	No 2000's	0	1	0	Y	1	0	0
Nakamura, Y., et al. (2006). "Egg consumption, serum total cholesterol concentrations and coronary heart disease incidence: Japan Public Health Center-based prospective study." Br J Nutr 96(5): 921-928.	Nakamura 2006	1	Japan	Observational	1				Ministry of Health, Labor and Welfare of Japan	No 2000's	0	1	0	Y	1	0	0
Qureshi, A. I., et al. (2007). "Regular egg consumption does not increase the risk of stroke and cardiovascular diseases." Med Sci Monit 13(1): CR1-8.	Qureshi 2007	1	US	Observational	1				Department of Neurology at University of Medicine and Dentistry of New Jersey	No 2000's	0	1	0	N	0	1	0
Weggemans RM, Zock PL, Meyboom S, Funke H, Katan MB. Apolipoprotein A4-½ polymorphism and response of serum lipids to dietary cholesterol in humans. J Lipid Res. 2000;41:1623-1628.	Weggemans 2000	1	The Netherlands	Intervention trial		1			This study was financially supported by the Netherlands Heart Foundation, grant number 95.118, and the Wageningen Centre for Food Sciences.	No 2000's	0	1	0	Y	1	0	0	Crossover comparison of 2 diets, both high in sat fat, but differing in dietary cholesterol, for their effect on LDL, in participants with specific genotypes.	Crossover	Not specified	1	0			1	0	29d	4	4	50	50										4	4	4	4	50	50	50	50
MacPherson A, Sparks NHC, Speake BK, Surai PF. Designer egg evaluation in a controlled trial. Eur J Clin Nutr. 2000;54(4):298.	MacPherson 2000	1	Scotland	Intervention trial		1			Scottish Office Agriculture, Environment, and Fisheries Department.	No 2000's	0	1	0	N	0	1	0	Parallel comparison of nutrient-enriched eggs and control eggs, both consumed 1/d, for effects on blood levels of micronutrients.	Y	Y	1	0			1	0	8w	8	8	40	40										8	8	8	8	40	40	40	40
Lewis, N. M., et al. (2000) Serum lipid response to n-3 fatty acid enriched eggs in persons with hypercholesterolemia. J Am Diet Assoc 100, 365-367 DOI: 10.1016/S0002-8223(00)00111-5	Lewis 2000	1	US	Intervention trial		1			Agricultural Research Division of the University of Nebraska; the North Dakota Oilseed Council; and the US Poultry and Egg Association	Yes 2000's	1	0	0	Y	1	0	1	Crossover comparison of 3 diets: no egg, 12 n3-enriched eggs/w or 12 regular eggs/w for effects on lipids.	Crossover	Y	1	0	1	0			6w	6	6	25	25		6	6	6	6	25	25	25	25
Reaven GM, Abbasi F, Bernhart S, Coulston A, Darnell B, Dashti N, Kim H, Kulkarni K, Lamendola C, McLaughlin T, Osterlund L, Schaff P, Segrest J. Insulin resistance, dietary cholesterol, and cholesterol concentration in postmenopausal women. Metabolism. 2001;50:594–597.	Reaven 2001	1	US	Intervention trial		1			Supported by research grants from the Egg Nutrition Center, Washington, DC, and Grants No. RR-00032 and RR-00070 from the National Institutes of Health, Division of Research Resources, Bethesda, MD	Yes 2000's	1	0	0	Y	1	0	1	Parallel comparison of diets containing 319, 523, or 941 mg cholesterol, for their effects on lipids.	Y	Y	1	0	1	0			4w	4	4	65	65		4	4	4	4	65	65	65	65
Bautista, L. E., O. F. Herrán, et al. (2001) Effects of palm oil and dietary cholesterol on plasma lipoproteins: results from a dietary crossover trial in free-living subjects. Eur J Clin Nutr 748-754 DOI: 10.1038/sj.ejcn.1601218	Bautista 2001	1	Colombia	Intervention trial		1			Funding unknown	Unknown 2000's	0	1	1	Y	1	0	0	Crossover comparison of 4 diets: high-palm-oil/low-chol, high-palm-oil/high-chol, mod-palm-oil/mod-chol, and high-palm-oil/high-chol, for effects on lipids.	Crossover	Y	1	0			1	0	4w	4	4	28	28										4	4	4	4	28	28	28	28
Homma, Y., T. Kobayashi, et al. (2001). "Apolipoprotein-E phenotype and basal activity of low-density lipoprotein receptor are independent of changes in plasma lipoprotein subfractions after cholesterol ingestion in Japanese subjects." Nutrition 17(4): 310-314.	Homma 2001	1	Japan	Intervention trial		1			Funding unknown	Unknown 2000's	0	1	1	Y	1	0	0	Uncontrolled comparison of the effect of added dietary chol (750 mg/d) as dried egg yolk in individuals with differing APOE genotypes, for effects on plasma lipids.	N	N	0	1			0	1	4w	4	4	110	110										4	4	4	4	110	110	110	110
Chakrabarty, G., R. L. Bijlani, et al. (2002) The effect of ingestion of egg on serum lipid profile in healthy young free-living subjects. Indian J Physiol Pharmacol 492-498	Chakrabarty 2002	1	India	Intervention trial		1			Indian Council of Medical Research (ID No. 2000-00460)	No 2000's	0	1	0	Y	1	0	0	Crossover comparison of 1 egg/d vs no eggs on serum lipids.	Crossover	Y	1	0			1	0	8w	8	8	18	18										8	8	8	8	18	18	18	18
Curran-Celentano, J. M., et al. (2003) Evaluating the Influence of Egg Consumption as a Source of Macular Carotenoids and the Impact on Serum Cholesterol Risk Ratios. Iovs ARVO E-abstract 403	Curran-Celentano 2003	1	Unknown, but authors work in the US	Intervention trial		1			Egg Nutrition Center	Yes 2000's	1	0	0	Y	1	0	1	Comparison of 6 eggs/w vs placebo for 3m for effects on macular carotenoids.	Y	Y	1	0	1	0			3m	12	12	7	7		12	12	12	12	7	7	7	7
Knopp, R. H., et al. (2003) Effects of insulin resistance and obesity on lipoproteins and sensitivity to egg feeding. Arterioscler Thromb Vasc Biol 23, 1437-1443	Knopp 2003	1	US	Intervention trial		1			Egg Nutrition Center	Yes 2000's	1	0	0	Y	1	0	1	Crossover comparison of 3 conditions: 0, 2, or 4 eggs/d, and categorized participants as insulin-sensitive (IS), insulin-resistant (IR), or obese insulin-resistant (OIR), testing effects of IR and obesity on sensitivity to chol.	Crossover	Y	1	0	1	0			4w	4	4	197	197		4	4	4	4	197	197	197	197
Maki, K. C., et al. (2003). "Lipid responses in mildly hypertriglyceridemic men and women to consumption of docosahexaenoic acid-enriched eggs." Int J Vitam Nutr Res 73(5): 357-368.	Maki 2003	1	US	Intervention trial		1			Sponsored by Martek inc.(nutritional supplement company); Omega Tech Inc. supplied egg	No 2000's	0	1	0	Y	1	0	0	Parallel comparison of DHA-enriched eggs and regular eggs for their effects on lipids.	N (There was a comparison between enriched and regular eggs, but no egg-free control)	Y (only between enriched and regular eggs)	0	1			0	1	6w	6	6	153	153										6	6	6	6	153	153	153	153
Chung HY, Rasmussen HM, Johnson EJ. Lutein bioavailability is higher from lutein-enriched eggs than from supplements and spinach in men. J Nutr. 2004;134:1887–93.	Chung 2004	1	US	Intervention trial		1			Supported by U.S. Department of Agriculture grant 581950 –9-001 and the Egg Nutrition Center. Any opinion, findings, conclusion or recommendations expressed in this publication are those of the authors and do not necessarily reflect the view of the U.S. Department of Agriculture. H.C. was supported by The Korean Science and Engineering Foundation.	Yes 2000's	1	0	0	N	0	1	0	Crossover comparison of 4 conditions: lutein, lutein ester, spinach, or lutein-enriched egg for effects on serum lutein.	Crossover	Y	1	0	1	0			9d	1	1	10	10		1	1	1	1	10	10	10	10
Chakrabarty, G., S. Manjunatha, et al. (2004) The effect of ingestion of egg on the serum lipid profile of healthy young Indians. Indian J Physiol Pharmacol 286-292	Chakrabarty 2004	1	India	Intervention trial		1			We would like to thank the Indian Council of Medical Research for financial support (ID No. 2000-00460).	No 2000's	0	1	0	Y	1	0	0	Crossover comparison of 1 egg/d vs no eggs on serum lipids.	Crossover	Y	1	0			1	0	8w	8	8	34	34										8	8	8	8	34	34	34	34
Sindelar, C. A., et al. (2004) Serum lipids of physically active adults consuming omega-3 fatty acid-enriched eggs or conventional eggs. Nutr Res 24, 731-739 DOI: 10.1016/j.nutres.2004.05.003	Sindelar 2004	1	US	Intervention trial		1			The Hatch Act- multistate research fund	No 2000's	0	1	0	Y	1	0	0	Crossover comparison of n3-enriched egg and regular egg on lipids.	Crossover	Y	1	0			1	0	4w	4	4	12	12										4	4	4	4	12	12	12	12
Greene, C. M., T. L. Zern, et al. (2005) Maintenance of the LDL cholesterol:HDL cholesterol ratio in an elderly population given a dietary cholesterol challenge. Journal of nutrition 2793-2798	Greene 2005	1	US	Intervention trial		1			Supported by the American Egg Board/Egg Nutrition Center. Maria Luz Fernandez is an author in this study.	Yes 2000's	1	0	0	Y	1	0	1	Liquid eggs, equiv to 3 whole eggs, vs chol-free egg substitute for effects on lipids.	Crossover	Y	1	0	1	0			30d	4	4	42	42		4	4	4	4	42	42	42	42
Katz, D. L., et al. (2005) Egg consumption and endothelial function: a randomized controlled crossover trial. Int J Cardiol 99, 65-70	Katz 2005	1	US	Intervention trial		1			Egg Nutrition Center/American Egg Board and the Centers for Disease Control and Prevention	Yes 2000's	1	0	0	N	0	1	0	Crossover comparison of 3 eggs/d or oats for effects on endothelium.	Crossover	Y	1	0	1	0			6w	6	6	49	49		6	6	6	6	49	49	49	49
Cesar, T. B., M. R. Oliveira, et al. (2006). "High cholesterol intake modifies chylomicron metabolism in normolipidemic young men." J Nutr 136(4): 971-976.	Cesar 2006	1	Brazil	Intervention trial		1			Supported by Programa de Apoio ao Desenvolvimento Cientifico da Faculdade de Ciencias Farmaceuticas (FCF-UNESP), Araraquara, Brazil; Grant PADC 94/15-I, and by Fundacao do Amparo a Pesquisa do Estado de Sao Paulo (FAPESP), Sao Paulo, Brazil. Grant FAPESP 99/01229-2.	No 2000's	0	1	0	Y	1	0	0	Parallel comparison of 2 diets with low (174mg/d, no egg) vs high (804mg/d) dietary cholesterol for effects on chylomicron metabolism.	Y	Not specified	1	0			1	0	15d	2	2	12	12										2	2	2	2	12	12	12	12
Goodrow E F, Wilson, TA, Houde SC, et al. (2006) Consumption of one egg per day increases serum lutein and zeaxanthin concentrations in older adults without altering serum lipid and lipoprotein cholesterol concentrations. Journal of nutrition 2519-2524	Goodrow 2006	1	US	Intervention trial		1			Supported by the American Egg Board, Egg Nutrition Center, Washington, DC (R.J.N.) and the Massachusetts Lions Eye Research Fund, New Bedford, MA (R.J.N.)	Yes 2000's	1	0	0	Y	1	0	1	Crossover comparison of 1 egg/d vs egg substitute, for effect on lutein, zeaxanthin, and lipids.	Crossover	Y	1	0	1	0			5w x2	5	5	33	33		5	5	5	5	33	33	33	33
Herron, K. L., I. E. Lofgren, et al. (2006a) Associations between plasma lipid parameters and APOC3 and APOA4 genotypes in a healthy population are independent of dietary cholesterol intake. Atherosclerosis 113-120 DOI: 10.1016/j.atherosclerosis.2005.03.023	Herron 2006a	1	US	Intervention trial		1			This work was supported by the American Egg Board. KLH [KL Herron] is the 2002 recipient of the American Egg Board Egg Nutrition Center Dissertation Fellowship in Nutrition.	Yes 2000's	1	0	0	Y	1	0	1	Liquid eggs, equiv to 3 whole eggs, vs chol-free eggs to assess whether genes influence serum lipid response to dietary chol.	Crossover	Y	1	0	1	0			30d	4	4	91	91		4	4	4	4	91	91	91	91
Wenzel, A. J., et al. (2006) A 12-Wk egg intervention increases serum zeaxanthin and macular pigment optical density in women. Journal of nutrition 136, 2568-2573	Wenzel 2006	1	US	Intervention trial		1			Egg Nutrition Center and New Hampshire Agricultural Experiment Station	Yes 2000's	1	0	0	N	0	1	0	Comparison of low-lutein/zeaxanthin egg vs high lutein/zeaxanthin egg vs placebo for effect on retinal lutein or zeaxanthin or macular pigment.	Y (control is for micronutrients)	Not specified	1	0	1	0			12w	12	12	13	13		12	12	12	12	13	13	13	13
Bovet, P., D. Faeh, et al. (2007) Decrease in blood triglycerides associated with the consumption of eggs of hens fed with food supplemented with fish oil. Nutr Metab Cardiovasc Dis 280-287 DOI: 10.1016/j.numecd.2005.12.010	Bovet 2007	1	Seychelles, Africa	Intervention trial		1			The Seychelles Marketing Board, which produces the regular eggs and the n-3 PUFA enriched eggs, provided unconditional partial funding.	Yes 2000's	1	0	0	Y	1	0	1	Crossover comparison of 5 regular vs n3-enriched eggs per week, for effects on lipids.	Crossover	Y	1	0	1	0			3w	3	3	23	23		3	3	3	3	23	23	23	23
Harman, N. L., A. R. Leeds, et al. (2008) Increased dietary cholesterol does not increase plasma low density lipoprotein when accompanied by an energy-restricted diet and weight loss. Eur J Nutr 287-293 DOI: 10.1007/s00394-008-0730-y	Harman 2008	1	England	Intervention trial		1			This study was partly supported by the British Egg Industry Council, UK.	Yes 2000's	1	0	0	Y	1	0	1	Parallel comparison of energy restriction + 2 eggs vs energy restriction with no eggs for effects on lipids.	Y	Y	1	0	1	0			12w	12	12	24	24		12	12	12	12	24	24	24	24
Mayurasakorn, K., et al. (2008). "High-density lipoprotein cholesterol changes after continuous egg consumption in healthy adults." J Med Assoc Thai 91(3): 400-407.	Mayurasakorn 2008	1	Thailand	Intervention trial		1			National Research Council of Thailand	No 2000's	0	1	0	Y	1	0	0	Uncontrolled test of addition of 1 egg/d, along with a reduced-fat NCEP diet for effects on lipids.	N	N	0	1			0	1	12w	12	12	46	46										12	12	12	12	46	46	46	46
Mutungi, G., et al. (2008) Dietary cholesterol from eggs increases plasma HDL cholesterol in overweight men consuming a carbohydrate-restricted diet. Journal of nutrition 138, 272-276	Mutungi 2008	1	US	Intervention trial		1			Egg Nutrition Center	Yes 2000's	1	0	0	Y	1	0	1	Parallel comparison of a carb-restricted diet including eggs vs carb-restricted diet without eggs, for effects on metabolic syndrome.	Y	Y	1	0	1	0			12w	12	12	15	15		12	12	12	12	15	15	15	15
Ohman, M., et al. (2008). "Biochemical effects of consumption of eggs containing omega-3 polyunsaturated fatty acids." Ups J Med Sci 113(3): 315-323.	Ohman 2008	1	Sweden	Intervention trial		1			Uppsala University Hospital Research Fund and eggs donated by Källbergs Industri AB	No 2000's	0	1	0	N	0	1	0	Crossover comparison of 1 standard egg/d vs 1 n3-enriched egg/d for effects on lipids, glucose, and inflammation.	Crossover	Not specified	1	0			1	0	1 month	4	4	19	19										4	4	4	4	19	19	19	19
Shapira, N. and J. Pinchasov (2008). "Modified egg composition to reduce low-density lipoprotein oxidizability: high monounsaturated fatty acids and antioxidants versus regular high n-6 polyunsaturated fatty acids." J Agric Food Chem 56(10): 3688-3693.	Shapira 2008	1	Israel	Intervention trial		1			Source of support: Tnuva Ltd., Israel.	No 2000's	0	1	0	Y	1	0	0	Crossover comparison of 4 phases: 2-4 eggs/w, 2 high-PUFA eggs/d, 2 high-PUFA/high-antioxidant eggs/d, or 2 high-MUFA/high-antioxidant eggs/d, for effects on LDL oxidation.	Crossover	N	1	0			1	0	4 separate 3w periods	3	3	17	17										3	3	3	3	17	17	17	17
Vander Wal, J. S., et al. (2008) Egg breakfast enhances weight loss. Int J Obes (Lond) 32, 1545-1551 DOI: 10.1038/ijo.2008.130	Vander Wal 2008	1	US	Intervention trial		1			The American Egg Board	Yes 2000's	1	0	0	N	0	1	0	Parallel comparison of 4 groups: 2 eggs/d vs bagel with no calorie restriction, and 2 eggs/d vs bagel with calorie restriction for effects on body weight.	Y	Y	1	0	1	0			8w	8	8	77	77		8	8	8	8	77	77	77	77
Vishwanathan, R., et al. (2009). "Consumption of 2 and 4 egg yolks/d for 5 wk increases macular pigment concentrations in older adults with low macular pigment taking cholesterol-lowering statins." Am J Clin Nutr 90(5): 1272-1279.	Wishwanathan 2009	1	US	Intervention trial		1			The American Egg Board, Egg Nutrition Center, and the Massachusetts Lions Eye Research Fund Inc	Yes 2000's	1	0	0	N	0	1	0	All participants followed the same sequence of 2 eggs/d followed by 4 eggs/d for 5w each, with 4w egg-free periods before each egg phase, for effects on macular pigment.	N	N	0	1	0	1			2 separate 5w periods	5	5	52	52		5	5	5	5	52	52	52	52
Vislocky, L. M., et al. (2009) Habitual consumption of eggs does not alter the beneficial effects of endurance training on plasma lipids and lipoprotein metabolism in untrained men and women. Journal of nutritional biochemistry 20, 26-34 DOI: 10.1016/j.jnutbio.2007.11.011	Vislocky 2009	1	US	Intervention trial		1			The American Egg Board	Yes 2000's	1	0	0	Y	1	0	1	Parallel comparison of exercise + 12 eggs/w vs exercise + no eggs for effects on lipids.	Y	Y	1	0	1	0			8w	8	8	5	5		8	8	8	8	5	5	5	5
Totals 2000s		33	0		4	28	0	1		Totals 2000s	17	16	2	Totals 2000s	25	8	12				24	4	15	1	9	3									6.625	5.5			45.5	29			5.58333	4			44.9167	31
2010s
Griffin JD, Lichtenstein AH. Dietary cholesterol and plasma lipoprotein profiles:randomized-controlled trials. Curr Nutr Rep. 2013;2(4): 274–282.	Griffin 2013	1	US	Systematic Review				1	John D. Griffin has received financial support through the National Institutes of Health (NIH) Obesity and Metabolism Training Grant.	No 2010's	0	1	0	Y	1	0	0
Tran NL, Barraj LM, Heilman JM, Scrafford CG. Egg consumption and cardiovascular disease among diabetic individuals: a systematic review of the literature. Diabetes Metab Syndr Obes. 2014;98:146–59.	Tran 2014	1	US	Systematic review				1	This work was partially funded by the Egg Nutritoin Center (ENC). ENC did not contribute to the writing, analysis, or interpretation of research findings.	Yes 2010's	1	0	0	N	0	1	0
Berger S, Raman G, Vishwanathan R, Jacques PF, Johnson EJ. Dietary cholesterol and cardiovascular disease: a systematic review and meta-analysis. Am J Clin Nutr. 2015:102(2):276-94.	Berger 2015	1	US	Review, Meta-analysis				1	Supported by USDA agreement 1950-51000-073 and the American Egg Board, Egg Nutrition Center.	Yes 2010's	1	0	0	1	1	0	1
Richard C, Cristall L, Fleming E, et al. Impact of Egg Consumption on Cardiovascular Risk Factors in Individuals with Type 2 Diabetes and at Risk for Developing Diabetes: A Systematic Review of Randomized Nutritional Intervention Studies. Can J Diabetes. 2017;41(4):453-463. doi: 10.1016/j.jcjd.2016.12.002.	Richard 2017	1		Systematic review				1	The authors report having recieved financial support from the Canadian Institutes of Health Research, Izaak Walton Willam Memorial Postdoctoral Fellowships, Dairy Farmers of Canada, Alberta Canola Council Commission, Food for Health Initiative (ALMA/AIBS/AB Egg Producers, but state that this "systematic review was not funded by any grants held by Dr. Field or her collaborators."	No 2010s	0	1	0	Y	1	0	0
Geiker NRW, Larsen ML, Dyerberg J, Stender S, Astrup A. Egg consumption, cardiovascular diseases and type 2 diabetes. Eur J Clin Nutr. 2018;72(1):44-56. doi: 10.1038/ejcn.2017.153.	Geiker 2018	1		Systematic review				1	Danish Egg Association	Yes 2010s	1	0	0	Y	1	0	1
Djousse, L., A. Kamineni, et al. (2010). "Egg consumption and risk of type 2 diabetes in older adults." Am J Clin Nutr 92(2): 422-427.	Djousse 2010	1	US	Observational	1				Supported by contracts N01-HC-85079 through N01-HC-85086, N01-HC-35129, N01 HC-15103, N01 HC-55222, U01 HL080295, 5K01- HL70444, and R01 HL094555-01A1 from the National Heart, Lung, and Blood Institute with additional contribution from the National Institute of Neurological Disorders and Stroke.	No 2010's	0	1	0	N	0	1	0
Houston, D. K., J. Ding, et al. (2011). "Dietary fat and cholesterol and risk of cardiovascular disease in older adults: the Health ABC Study." Nutr Metab Cardiovasc Dis 21(6): 430-437.	Houston 2011	1	US	Observational	1				This research was supported in part by the Intramural Research Program of the NIH, National Institute on Aging; National Institute on Aging contracts N01-AG-6-2101, N01-AG-6-2103, and N01-AG-6-2106; the Wake Forest University Claude D. Pepper Older Americans Independence Center (P30-AG21332); and the American Egg Board/Egg Nutrition Center.	Yes 2010's	1	0	0	N	0	1	0
Shi, Z., et al. (2011). "Egg consumption and the risk of diabetes in adults, Jiangsu, China." Nutrition 27(2): 194-198.	Shi 2011	1	Multiple, Unknown	Observational	1				Jiangsu Provincial Natural Science Foundation and Jiangsu Provincial Health Bureau.	No 2010's	0	1	0	N	0	1	0
Spence, J. D., et al. (2012). "Egg yolk consumption and carotid plaque." Atherosclerosis 224(2): 469-473.	Spence 2012	1	Canada	Observational	1				Heart & Stroke Foundation of Ontario and Stroke Prevention & Atherosclerosis Research Centre	No 2010's	0	1	0	N	0	1	0
Virtanen, J. K., et al. (2015). "Egg consumption and risk of incident type 2 diabetes in men: the Kuopio Ischaemic Heart Disease Risk Factor Study." Am J Clin Nutr 101(5): 1088-1096.	Virtanen 2015	1	Finland	Observational	1				University of Eastern Finland, Institute of Public Health and Clinical Nutrition	No 2010's	0	1	0	N	0	1	0
Nicklas, T. A., et al. (2015). "Differing statistical approaches affect the relation between egg consumption, adiposity, and cardiovascular risk factors in adults." J Nutr 145(1): 170S-176S.	Nicklas 2015	1	US	Observational	1				USDA/Agricultural Research Service; Egg Nutrition Board; USDA Hatch Project	Yes 2010's	1	0	0	N	0	1	0
Oggioni C, Cena H, Wells JC, Lara J, Celis-Morales C, Siervo M. Association between worldwide dietary and lifestyle patterns with total cholesterol concentrations and DALYs for infectious and cardiovascular diseases: an ecological analysis. J Epidemiol Glob Health. 2015;5(4):315-325. doi: 10.1016/j.jegh.2015.02.002.	Oggioni 2015	1		Observational study	1				No funding reported.	No 2010s	0	1	0	Y	1	0	0
Virtanen JK, Mursu J, Virtanen HE, et al. Associations of egg and cholesterol intakes with carotid intima-media thickness and risk of incident coronary artery disease according to apolipoprotein E phenotype in men: the Kuopio Ischaemic Heart Disease Risk Factor Study. Am J Clin Nutr. 2016;103(3):895-901. doi: 10.3945/ajcn.115.122317.	Virtanen 2016	1		Observational study	1				University of Eastern Finland	No 2010s	0	1	0	N	0	1	0
Song J, He JJ, Fang AP, et al. [Association between food intake and the serum total cholesterol level among adults in 9 regions of China]. Zhonghua Xin Xue Guan Bing Za Zhi. 2017;45(3):235-242. doi: 10.3760/cma.j.issn.0253-3758.2017.03.012. I don't believe we have a decision on this one yet, so I included it for when you review the abstract.	Song 2017	1		Observational study	1				Funding not reported	No 2010s	0	1	1		1	0
Vazquez-Ruiz Z, De la Fuente-Arrillaga C, Bes-Rastrollo M, et al. Egg consumption and dyslipidemia in a Mediterranean cohort. Nutr Hosp. 2018;35(1):153-161. doi: 10.20960/nh.1347.	Vazquez-Ruiz 2018	1		Observational study	1				Spanish Government-Instituto de Salud Carlos III, the European Regional Development Fund (FEDER), the Navarra Regional Government, and the University of Navarra.	No 2010s	0	1	0	Y	1	0	0
Ata S, Barona J, Kopec R, Jones J, Calle M, Schwartz S, Fernandez M. Consumption of one regular egg or a lutein-enriched egg per day increases HDL cholesterol, reduces apolipoprotein B and the number of small LDL particles while increasing plasma carotenoids and macular pigment density in adult subjects. FASEB J. 2010;24:A92.4	Ata 2010	1	US	Intervention trial		1			Supported by the Egg Board	Yes 2010's	1	0	0	Y	1	0	1	Parallel comparison of 1 egg, 1 egg substitute, or 1 lutein-fortified egg/d for effects on lipids, circulating carotenoids, and macular pigments.	Y	Not specified	1	0	1	0			12w	12	12	22	22		12	12	12	12	22	22	22	22
Njike, V., et al. (2010) Daily egg consumption in hyperlipidemic adults--effects on endothelial function and cardiovascular risk. Nutr J 9, 28 DOI: 10.1186/1475-2891-9-28	Njike 2010	1	US	Intervention trial		1			Egg Nutrition Center and the Centers for Disease Control & Prevention	Yes 2010's	1	0	0	N	0	1	0	Crossover comparison of 2 eggs vs 1/2 cup egg substitute for effects on endothelial function and serum lipids.	Crossover	Y	1	0	1	0			6w	6	6	36	36		6	6	6	6	36	36	36	36
Hegde, M. V., A. A. Zanwar, et al. (2011) Omega-3 fatty acid enriched eggs are heart friendly. Atherosclerosis Supplements 148	Hedge 2011	1	India	Intervention trial		1			Funding unknown	Unknown 2010's	0	1	1	Y	1	0	0	Parallel comparison of 8 n3-enriched eggs/w vs 4 fish oil capsules/w for 2w for effect on lipids.	Y	Y	1	0			1	0	2w	2	2	25	25										2	2	2	2	25	25	25	25
Pearce, K. L., et al. (2011). "Egg consumption as part of an energy-restricted high-protein diet improves blood lipid and blood glucose profiles in individuals with type 2 diabetes." Br J Nutr 105(4): 584-592.	Pearce 2011	1	Australia	Intervention trial		1			Australian Egg Corporation Limited and scholarship funding from the Commonwealth Scientific and Industrial Research Organisation Food and Nutritional Sciences and the Department of Physiology, University of Adelaide	Yes 2010's	1	0	0	Y	1	0	1	Parallel comparison of a hypocaloric diet including 2 eggs vs hypocaloric diet with 100g meat replacing the eggs, as part of weight-loss study.	Y	Y	1	0	1	0			12w	12	12	31	31		12	12	12	12	31	31	31	31
Klangjareonchai T, Putadechakum S, Sritara P, Roongpisuthipong C. The effect of egg consumption in hyperlipidemic subjects during treatment with lipid-lowering drugs. J Lipids 2012;2012:672720	Klangjareonchai 2012	1	Thailand	Intervention trial		1			Funding unknown	Unknown 2010's	0	1	1	Y	1	0	0	Uncontrolled study of addition of 3 eggs/d for effects on lipids in patients taking chol-lowering drugs.	N	N	0	1			0	1	12w	12	12	57	57										12	12	12	12	57	57	57	57
Baumgartner, S., E. R. Kelly, et al. (2013). "The influence of consuming an egg or an egg-yolk buttermilk drink for 12 wk on serum lipids, inflammation, and liver function markers in human volunteers." Nutrition 29(10): 1237-1244.	Baumgartner 2013	1	The Netherlands	Intervention trial		1			This study was financially supported by the Food and Nutrition Delta (FND) and the (enriched) eggs and buttermilk drinks were provided by Newtricous, Oirlo, The Netherlands.	No 2010's	0	1	0	Y	1	0	0	Parallel design with 3 groups: one group continued usual diet, a 2nd group added 1 extra egg/d, and a 3rd group added 1 egg yolk in a buttermilk drink each day for effects on lipids.	Y	Y	1	0			1	0	12w	12	12	77	77										12	12	12	12	77	77	77	77
Blesso, C. N., C. J. Andersen, et al. (2013a) Whole egg consumption improves lipoprotein profiles and insulin sensitivity to a greater extent than yolk-free egg substitute in individuals with metabolic syndrome. Metabolism 400-410 DOI: 10.1016/j.metabol.2012.08.014	Blesso 2013a	1	Study participants from unknown country, but authors from US and Colombia	Intervention trial		1			This study was funded by the American Egg Board/Egg Nutrition Center. MLF (Maria Luz Fernandez) designed research, analyzed data and had primary responsibility for final content.	Yes 2010's	1	0	0	Y	1	0	1	Parallel design of carb-restricted diet with eggs and carb-restricted diet with egg substitute for effects on lipids.	Y	Y	1	0	1	0			12w	12	12	20	20		12	12	12	12	20	20	20	20
Rueda JM, Khosla P. Impact of breakfasts (with or without eggs) on body weight regulation and blood lipids in university students over a 14-week semester. Nutrients. 2013;5(12): 5097-5113.	Rueda 2013	1	US	Intervention trial		1			The American Egg Board	Yes 2010's	1	0	0	Y	1	0	1	Parallel comparison of breakfasts including 2 eggs, 5d/w vs no eggs for effects on weight and lipids.	Y	Y	1	0	1	0			14w	14	14	27	27		14	14	14	14	27	27	27	27
Bunger, M., M. Quataert, et al. (2014). "Bioavailability of lutein from a lutein-enriched egg-yolk beverage and its dried re-suspended versions." Int J Food Sci Nutr 65(7): 903-909.	Bunger 2014	1	The Netherlands	Intervention trial		1			This study was financially supported by Newtricous, Oirlo, the Netherlands, and by the Dutch Food and Nutrition Delta Programme (project FND10004).	No 2010's	1	0	0	N	0	1	0	Parallel design with 4 groups: control (no egg), lutein-enriched egg-yolk beverage, dried version of same beverage, dried individual components of same drink.	Y	Y	1	0	1	0			6w	6	6	70	70		6	6	6	6	70	70	70	70
Burns-Whitmore, B., E. Haddad, et al. (2014) Effects of supplementing n-3 fatty acid enriched eggs and walnuts on cardiovascular disease risk markers in healthy free-living lacto-ovo- vegetarians: A randomized, crossover, free-living intervention study. Nutr J DOI: 10.1186/1475-2891-13-29	Burns-Whitemore 2014	1	US	Intervention trial		1			This work was supported by the American Egg Board Fellowship; Agriculture Research Institute (Grant) from California State Polytechnic University, Pomona; California Walnut Commission (in-kind donation of walnuts); Chino Valley Ranchers (in-kind donation of eggs). Several authors (JS, EH, SR) have received previous research grants from the walnut and other nut industries. BBW (Bonny Burns-Whitmor…	Yes 2010's	1	0	0	N	0	1	0	n3-enriched egg (6/w) vs standard egg (6/w) vs walnuts (28.4g, 6x/w) for effects on CVD risk markers	Crossover	Y	1	0	1	0			8w	8	8	20	20		8	8	8	8	20	20	20	20
van der Made, S. M., et al. (2014). "Consuming a buttermilk drink containing lutein-enriched egg yolk daily for 1 year increased plasma lutein but did not affect serum lipid or lipoprotein concentrations in adults with early signs of age-related macular degeneration." J Nutr 144(9): 1370-1377.	van der Made 2014	1	The Netherlands	Intervention trial		1			Europees Fonds voor Regionale Ontwikkeling, Dutch Ministry of Economic Affairs, the Province of Limburg, and Newtricious (manufacturer of egg-derived food supplements)	Yes 2010's	1	0	0	Y	1	0	1	Parallel comparison of 1.5 egg yolks in buttermilk vs buttermilk alone for effects on plasma lutein and vision.	Y	Y	1	0	1	0			1y	52	52	45	45		52	52	52	52	45	45	45	45
Katz, D. L., et al. (2015) Effects of egg ingestion on endothelial function in adults with coronary artery disease: A randomized, controlled, crossover trial. Am Heart J 169, 162-169	Katz 2015	1	US	Intervention trial		1			Egg Nutrition Center/American Egg Board and the Centers for Disease Control and Prevention	Yes 2010's	1	0	0	N	0	1	0	Crossover comparison of 3 diff bkfasts: 2 eggs vs 1/2 cup egg subst vs high-carb bkfast for effects on endothelial function.	Crossover	Y	1	0	1	0			6w	6	6	30	30		6	6	6	6	30	30	30	30
Ballesteros, M. N., F. Valenzuela, et al. (2015) One egg per day improves inflammation when compared to an oatmeal-based breakfast without increasing other cardiometabolic risk factors in diabetic patients. Nutrients 3449-3463 DOI: 10.3390/nu7053449	Ballesteros 2015	1	Mexico	Intervention trial		1			M.L.F. (Maria Luz Fernandez, one of the authors) received funding from the Egg Nutrition Center to conduct the human intervention portion of this study. M.N.B., F.V., A.E.R., E.A., D.A., C.J.A., and H.V. declare no conflict of interest.	Yes 2010's	1	0	0	N	0	1	0	Crossover comparison of 1 egg/d vs oatmeal for effects on plasma glucose and inflammatory markers.	Crossover	Y	1	0	1	0			5w	5	5	29	29		5	5	5	5	29	29	29	29
Clayton, Z. S., K. R. Scholar, et al. (2015) Influence of Resistance Training Combined with Daily Consumption of an Egg-based or Bagel-based Breakfast on Risk Factors for Chronic Diseases in Healthy Untrained Individuals. J Am Coll Nutr 113-119 DOI: 10.1080/07315724.2014.946622	Clayton 2015	1	US	Intervention trial		1			Funding was provided by the Egg Nutrition Council	Yes 2010's	1	0	0	Y	1	0	1	Parallel comparison of 2 eggs/d vs bagel bkfast during resistance-training on lipids, glucose, and other measures.	Y	Y	1	0	1	0			12w	12	12	11	11		12	12	12	12	11	11	11	11
Fuller, N. R., I. D. Caterson, et al. (2015) The effect of a high-egg diet on cardiovascular risk factors in people with type 2 diabetes: The Diabetes and Egg (DIABEGG) study- A 3-mo randomized controlled trial. American journal of clinical nutrition 705-713 DOI: 10.3945/ajcn.114.096925	Fuller 2015	1	Australia	Intervention trial		1			Supported by a research grant from the Australian Egg Corporation.	Yes 2010's	1	0	0	Y	1	0	1	Parallel comparison of 2 eggs/d for 6d/w vs <2 eggs/w + 10g meat; participants were also instructed to replace SFA with MUFA and PUFA	Y, but both diets reduced SFA.	Y	1	0	1	0			3m	12	12	60	60		12	12	12	12	60	60	60	60
Marsset-Baglieri, A., et al. (2015) The satiating effects of eggs or cottage cheese are similar in healthy subjects despite differences in postprandial kinetics. Appetite 90, 136-143 DOI: 10.1016/j.appet.2015.03.010	Marsset-Baglieri	1	France	Intervention trial		1			French Agency for Research and Technology	No 2010's	0	1	0	N	0	1	0	Crossover comparison of an omelet vs cottage cheese for their satiating power.	Crossover	Y	1	0			1	0	<1d	0	0	30	30										0	0	0	0	30	30	30	30
Missimer, A., et al. (2015) Intake of 2 eggs or oatmeal for breakfast does not increase biomarkers for heart disease while eggs improve liver enzymes and raise HDL cholesterol in young healthy individuals. FASEB journal 29, meeting abstract	Missimer 2015	1	US	Intervention trial		1			Unknown funding. However, later (2017) report for this study acknowledges funding from the Esperance Family Foundation. Note, PI Marie-Luz Fernandez has received prior industry funding.	No 2010's	0	1	0	Y	1	0	0	Crossover design of 2 eggs/d or oatmeal for 4w for effects on CVD risk factors.	Y	Y	1	0			1	0	4w	4	4	50	50										4	4	4	4	50	50	50	50
Severins, N., et al. (2015) Effects of lutein-enriched egg yolk in buttermilk or skimmed milk on serum lipids & lipoproteins of mildly hypercholesterolemic subjects. Nutrition, Metabolism and Cardiovascular Diseases 25, 210-217 DOI: 10.1016/j.numecd.2014.10.003	Severins 2015	1	The Netherlands	Intervention trial		1			Newtricious (Oirlo) (manufacturer of egg-derived food supplements)	Yes 2010's	1	0	0	Y	1	0	1	Parallel design with 4 groups: lunch with or without lutein-enriched egg yolk or buttermilk with or without lutein-enriched egg yolk, for effects on lipids.	Y	Y	1	0	1	0			12w	12	12	46	46		12	12	12	12	46	46	46	46
Kishimoto Y,, Taguchi C, Suzuki-Sugihara N. The Effect of the Consumption of Egg on Serum Lipids and Antioxidant Status in Healthy Subjects. J Nutr Sci Vitaminol (Tokyo). 2016;62(5):361-365. doi: 10.3177/jnsv.62.361.	Kishimoto 2016	1		Intervention trial		1			Kewpie Corporation (manufacturer of mayonnaise)	Yes 2010s	1	0	0	Y	1	0	1	Uncontrolled test of 1 egg/d for 4w in 14 participants for effects on lipids, with no prior washout period.	N Control was only for carotenoids, not for cholesterol.	N	0	1	0	1			4w	4	4	14	14		4	4	4	4	14	14	14	14
DiMarco DM, Norris GH, Millar CL, Blesso CN, Fernandez ML. Intake of up to 3 eggs per Day is associated with changes in HDL function and increased plasma antioxidants in healthy, young adults. J Nutr. 2017;147(3):323-329. doi: 10.3945/jn.116.241877.	DiMarco 2017	1		Intervention trial		1			Esperance Family Foundation and Egg Nutrition Center	Yes 2010s	1	0	0	Y	1	0	1	Comparison of 0, 1, 2, and 3 eggs/d, consumed for 4w each for effects on lipids. All participants had all treatments. The authors called it a "crossover" design, but all participants had the same treatments in the same order.	Participants served as their own controls.	N	1	0	1	0			4w	4	4	37	37		4	4	4	4	37	37	37	37
Kelly D, Nolan JM, Howard AN, et al. Serum and macular response to carotenoid-enriched egg supplementation in human subjects: the Egg Xanthophyll Intervention clinical Trial (EXIT). Br J Nutr. 2017;117(1):108-123. doi: 10.1017/S0007114516003895.	Kelly 2017	1		Intervention trial		1			Howard Foundation, European Research Council Starter grant. Eggs were provided by hen farmers and carotenoids were provided by Industrial Organica.	No 2010s	0	1	0	N	0	1	0	Comparison of carotenoid-enriched eggs to non-enriched eggs (1 egg, 5d/w for 8w), for effects on serum carotenoid concentrations and cholesterol, macular pigment, and visual function.	N. Control was only for carotenoids, not for cholesterol.	N	0	1			0	1	8w	8	8	46 (both groups received 1 egg/d, so both were "experimental" with regard to lipid outcomes.	46										8	8	8	8	46	46	46	46
Missimer A, DiMarco DM, Andersen CJ, Murillo AG, Vergara-Jimenez M, Fernandez ML. Consuming two eggs per day, as compared to an oatmeal breakfast, decreases plasma ghrelin while maintaining the LDL/HDL Ratio. Nutrients. 2017;9(2):89-101. pii: E89. doi: 10.3390/nu9020089.	Missimer 2017	1		Intervention trial		1			Esperance Family Foundation (Note: although Marie Luz Fernandez, who has received numerous Egg Nutrition Center grants, was the senior author, no ENC funding was reported for this study and no conflicts of interest were acknowledged.	No 2010s	0	1	0	Y	1	0	0	Crossover comparison of 2 eggs/d vs oatmeal in 48 participants for 4 weeks each.	Y Crossover	Y	1	0			1	0	4w	4	4	48	48										4	4	4	4	48	48	48	48
Taguchi C, Kishimoto Y, Suzuki-Sugihara N, et al. Regular egg consumption at breakfast by Japanese woman university students improves daily nutrient intakes: open-labeled observations. Asia Pac J Clin Nutr. 2018;27:359-365.	Taguchi 2018	1		Intervention trial		1			Kewpie Corporation (manufacturer of mayonnaise)	Yes 2010s	1	0	0	N	0	1	0	Uncontrolled test of 1 egg/d for 4w in 14 participants for effects on lipids, with no prior washout period (similar to Kishimoto 2016)	N	N	0	1	0	1			4w	4	4	14	14		4	4	4	4	14	14	14	14
Kim JE, Campbell WW. Dietary cholesterol contained in whole eggs is not well absorbed and does not acutely affect plasma total cholesterol concentration in men and women: Results from 2 randomized controlled crossover studies. Nutrients. 2018;10(9):1272-1283. pii: E1272. doi: 10.3390/nu10091272.	Kim 2018	1		Intervention trial		1			American Egg Board-Egg Nutrition Center, Purdue Ingestive Behavior Research Center, National University of Singapore.	Yes 2010s	1	0	0	Y	1	0	1	Crossover postprandial studies. Study 1 compared 0g egg, 75g egg, and 150g egg. Study 2 compared 0g vs 100g egg.	Crossover trials.	Y	1	0	1	0			10h (postprandial only)	0	0	33 (total of 16 in study 1 and 17 in study 2)	33 (total of 16 in study 1 and 17 in study 2)		0	0	0	0
Lemos BS, Medina-Vera I, Blesso CN, Fernandez ML. Intake of 3 eggs per day when compared to a choline bitartrate supplement, downregulates cholesterol synthesis without changing the LDL/HDL ratio. Nutrients. 2018;10(2):258-270. pii: E258. doi: 10.3390/nu10020258.	Lemos 2018	1		Intervention trial		1			Egg Nutrition Center, Brazilian National Center for Scientific and Techological Development (CNPq)	Yes 2010s	1	0	0	Y	1	0	1	Crossover comparison of 3 eggs/d vs a choline supplement for 4w each in 29 participants, for effects on lipids.	Y Crossover	Y	1	0	1	0			4w	4	4	29	29		4	4	4	4	29	29	29	29
McDonald JD, Chitchumroonchokchai C, Li J, et al. Replacing carbohydrate during a glucose challenge with the egg white portion or whole eggs protects against postprandial impairments in vascular endothelial function in prediabetic men by limiting increases in glycaemia and lipid peroxidation. Br J Nutr. 2018;119(3):259-270. doi: 10.1017/S0007114517003610.	McDonald 2018	1		Intervention trial		1			American Egg Board/Egg Nutrition Center.	Yes 2010s	1	0	0	N	0	1	0	Postprandial study: crossover comparison of test meals containing glucose, glucose + whole egg, egg whites, or egg yolks in 20 prediabetic men over 3h.	Y Crossover	Y	1	0	1	0			3h	0	0	20	20		0	0	0	0	20	20	20	20
Pourafshar S, Akhavan NS , George KS, et al. Egg consumption may improve factors associated with glycemic control and insulin sensitivity in adults with pre- and type II diabetes. Food Funct. 2018;9(8):4469-4479. doi: 10.1039/c8fo00194d.	Pourafshar 2018	1		Intervention trial		1			Egg Nutrition Center	Yes 2010s	1	0	0	N	0	1	0	Parallel comparison of 1 egg/d vs egg substitute for 12w in 42 participants with DM or preDM, for effects on glycemic control.	Y	Y	1	0	1	0			12w	12	12	42	42		12	12	12	12	42	42	42	42
Totals 2010s		42	0		10	27	0	5		Totals 2010s	25	17	3	Totals 2010s	24	18	14				23	4	18	2	5	2									9.85	7			31.7368	29			6	4			47.5714	48
All Years		211	0		27	172	3	9			76	135	33		177	34	59				126	46	56	10	70	36		5.76036	4	32.1775	21.5		7.64394	6			36.5077	25			4.5534	4			29.6286	18
[truncated: 42 more columns]

## Sheet: Unused sheet
																	Comparison of 0 mg and 1000 mg chol from egg yolks.	Participants were their own controls.	Not specified	4w	4 to 6, depending on the comparison		U	In 4 individuals who did all experimental diets, TC rose from 177 mg/dl on 0-chol diet to 232 mg/dl on 1000mg-chol diet (P<0.025). Corresponding change in LDL was from 119 to 160 mg/dl. In 6 participants, the corresponding changes in TC were from 171 to 233 mg/dl, and changes in LDL were from 167 to 224 mg/dl (P-values not given).	U (Reports data)		Effect of fiber on lipid concentrations.	Addition of fiber did not affect lipid concentrations.		0	1	0	0	1
																	Uncontrolled test of egg yolk (1g chol) in 6 men for 5w	N	N	5w	6		U (n.s.)	TC rose from 4.66 to 4.82 mmol/L (n.s.)	F ("no significant differences.)					0	1	0	1	0
																														0	1
																	Uncontrolled study of lipids in burn patients fed 35 eggs/d.	N	N	30d	8		U	TC rose from 108 to 176 mg/dl at day 30.	U (Reports data)		n/a	n/a		0	1	0	0	1
																	In exp 1, 6 participants ate 4-6 eggs/d x 4w. In exp 2, 5 participants ate 1, 2, and 3 eggs/d in succeeding 6w periods. Effects on HDL were measured.	N	N	Exp 1: 4w; exp 2: 18w.	11		U (significance not reported)	Article reports only individual data. Calculations show that addition of eggs in exp 1 increased TC from 203 to 223 mg/dl, and in exp 2 from 161 to 163.	Reports findings incidental to change in HDL.		Effect of egg feeding on HDL.	Egg feeding alters HDL composition and reactivity.		1	0

## Sheet: Sheet2
O												I	O	R
I												I	O	R
I												I	O	R
I												I	O	R
O												I	O	R
R												I	O	R
R												I	O	R
I												I	O	R
I												I	O	R
I												I	O	R
I												I	O	R
I												I	O	R
R												I	O	R
R												I	O	R
I												I	O	R
I												I	O	R
I												I	O	R
I												I	O	R
I												I	O	R
I												I	O	R
I												I	O	R
I												I	O	R
I												I	O	R
I												I	O	R
I												I	O	R
R												I	O	R
I												I	O	R
I												I	O	R
I												I	O	R
R												I	O	R
I												I	O	R
I												I	O	R
I												I	O	R
O												I	O	R
I												I	O	R
I												I	O	R
I												I	O	R
I												I	O	R
I												I		R
R												I		R
I												I		R
I												I		R
I												I		R
I												I		R
I												I		R
I												I		R
I												I		R
I												I		R
O												I		R
R												I		R
I												I		R
I												I		R
R												I		R
I												I		R
I												I		R
I												I		R
I												I		R
I												I		R
I												I		R
I												I		R
I												I		R
I												I		R
I												I		R
I												I		R
I												I		R
I												I		R
I												I		R
I												I		R
I												I		R
I												I		R
I												I		R
I												I		R
I												I		R
I												I		R
I												I		R
R												I		R
I												I		R
I												I		R
O												I		R
R												I		R
I												I		R
I												I		R
R												I		R
I												I		R
I												I		R
I												I		R
I												I		R
I												I		R
I												I		R
O												I		R
I												I		R
I												I		R
R												I		R
O												I		R
I												I
I												I
I												I
R												I
R												I
R												I
I												I
O												I
I												I
R												I
I												I
I												I
R												I
R												I
I												I
I												I
R												I
O												I
O												I
I												I
I												I
O												I
I												I
I												I
I												I
I												I
I												I
I												I
R												I
R												I
R												I
I												I
I												I
I												I
I												I
R												I
R												I
I												I
I												I
O												I
I												I
I												I
R												I
I												I
I												I
I												I
I												I
I												I
O												I
I												I
I												I
I												I
I												I
I												I
I												I
O												I
I												I
I												I
I												I
R												I
R												I
I												I
I												I
I												I
R												I
I												I
I												I
I												I
I												I
I												I
I												I
I												I
R												I
O												I
R												I
I												I
R												I
I												I
I												I
I												I
I												I
I												I
I												I
I												I
I												I
I												I
I												I
I												I
I												I
I												I
I												I
I												I
O												I
R												I
I												I
I												I
I												I
O												I
I												I
I												I
R												I
I												I
R												I
I												I
I												I
I												I
R												I
I												I
O												I
I												I
O												I
I												I
I												I
R												I
R												I
I												I
I												I
I												I
R												I
R												I
I												I
O												I
I												I
R												I
R												I
I												I
R												I
O												I
R												I
R												I
I												I
I												I
I												I
I												I
R												I
R												I
R												I
I												I
I												I
O												I
I												I
R												I
I												I
I												I
I												I
I												I
R												I
R												I
R												I
R												I
I												I
I												I
I												I
I												I
R												I
I												I
O												I
I												I
I												I
I												I
I												O
R												O
I												O
I												O
R												O
I												O
I												O
I												O
R												O
I												O
R												O
I												O
I												O
O												O
R												O
R												O
R												O
I												O
R												O
I												O
I												O
I												O
I												O
R												O
I												O
I												O
I												O
I												O
I												O
R												O
I												O
O												O
R												O
R												O
R												O
R												O
I												O
I												O
I												R
I												R
I												R
O												R
I												R
I												R
I												R
I												R
I												R
I												R
I												R
I												R
O												R
O												R
R												R
I												R
R												R
I												R
I												R
I												R
I												R
O												R
R												R
R												R
R												R
R												R
R												R
R												R
I												R
R												R
I												R
I												R
I												R
I												R
I												R
I												R
I												R
O												R
R												R
R												R
R												R
R												R
R												R
I												R
I												R
I												R
I												R
O												R
O												R
R												R
R												R
I												R
O												R
R												R
R												R
I												R
I												R
I												R
I												R
I												R
O												R
I												R
I												R
R												R
R												R
O												R
O												R
I												R
I												R
R												R
R												R
R												R
R												R
R												R
I												R
I												R
I												R
I												R
I												R
I												R
I												R
I												R
I												R
I												R
O												R
R												R
I												R
I												R
I												R
I												R
I												R
I												R
I												R
O	254	38	94	386								R
	165	38	91	294
